# Supplementary material for: Evaluation of potential anti-metastatic and antioxidative abilities of natural peptides derived from Tecoma stans (L.) Juss. ex Kunth in A549 cells
Source: PeerJ. 2022 Jul 6;10:e13693. doi: 10.7717/peerj.13693 (PMC9270879; doi:10.7717/peerj.13693)
Supplement: Supplemental Information 4 [file peerj-10-13693-s004.xlsx]

## Sheet: Sheet1
Supplemental Data S1. The differential protein expression profiles of A549 cells treated with natural peptides from Tecoma stans.
Accession	Protein name	log2 intensity (AU)		log2 fold change	Anova (p-value)
		Control	Treatment
NCBP2_HUMAN	Nuclear cap-binding protein subunit 2	17.1869	10.269	-7.43008	8.32196e-05
ILVBL_HUMAN	Acetolactate synthase-like protein	18.4487	14.6921	-3.28484	0.0120068
TMCO1_HUMAN	Calcium load-activated calcium channel	18.0101	14.3647	-3.2628	0.0104524
AMD_HUMAN	Peptidyl-glycine alpha-amidating monooxygenase	21.3378	17.2993	-3.02693	2.90541e-09
KBL_HUMAN	2-amino-3-ketobutyrate coenzyme A ligase, mitochondrial	19.2898	15.6877	-2.98204	0.00247663
KCNQ2_HUMAN	Potassium voltage-gated channel subfamily KQT member 2	22.7388	18.539	-2.94595	0.00811558
MER34_HUMAN	Endogenous retrovirus group MER34 member 1 Env polyprotein	20.0223	16.5028	-2.78892	2.14826e-10
ENC1_HUMAN	Ectoderm-neural cortex protein 1	17.6641	14.67	-2.67949	0.00011642
UBE4B_HUMAN	Ubiquitin conjugation factor E4 B	19.4617	16.3212	-2.53886	0.00731297
MORC3_HUMAN	MORC family CW-type zinc finger protein 3	19.5875	16.4828	-2.48967	0.0136823
GOSR1_HUMAN	Golgi SNAP receptor complex member 1	18.3245	15.5042	-2.4111	0.00200619
COA4_HUMAN	Cytochrome c oxidase assembly factor 4 homolog, mitochondrial	19.5782	16.6167	-2.36614	5.5653e-06
DGKA_HUMAN	Diacylglycerol kinase alpha	17.6511	15.1806	-2.17535	0.0136891
SH3L3_HUMAN	SH3 domain-binding glutamic acid-rich-like protein 3	22.9934	20.0941	-1.94448	0.0284168
MPIP3_HUMAN	M-phase inducer phosphatase 3	20.9852	18.3802	-1.91221	1.34284e-05
TB22A_HUMAN	TBC1 domain family member 22A	18.5044	16.2703	-1.85627	0.0105044
EIPR1_HUMAN	EARP-interacting protein	20.1131	17.7555	-1.79876	0.0180613
ACBD7_HUMAN	Acyl-CoA-binding domain-containing protein 7	18.031	16.021	-1.70517	0.000246895
RL31_HUMAN	60S ribosomal protein L31	21.1949	18.836	-1.70224	0.0201947
NUMA1_HUMAN	Nuclear mitotic apparatus protein 1	18.8425	16.7522	-1.69643	0.00156844
LEG8_HUMAN	Galectin-8	19.9499	17.7562	-1.6806	0.0277096
RM54_HUMAN	39S ribosomal protein L54, mitochondrial	20.7096	18.4437	-1.67178	0.0110655
CD11A_HUMAN	Cyclin-dependent kinase 11A	20.1232	17.9602	-1.64059	1.66873e-05
MA1B1_HUMAN	Endoplasmic reticulum mannosyl-oligosaccharide 1,2-alpha-mannosidase	18.4077	16.4491	-1.62303	0.00473824
VMP1_HUMAN	Vacuole membrane protein 1	23.88	21.3505	-1.61531	0.000743046
CNOT9_HUMAN	CCR4-NOT transcription complex subunit 9	20.7684	18.578	-1.60798	0.00575832
CDKN3_HUMAN	Cyclin-dependent kinase inhibitor 3	19.6659	17.6377	-1.57034	0.00083727
LBR_HUMAN	Lamin-B receptor	21.5552	19.3422	-1.56283	0.00297676
FACR1_HUMAN	Fatty acyl-CoA reductase 1	21.1854	19.0534	-1.53019	3.72665e-06
SAP3_HUMAN	Ganglioside GM2 activator	20.9082	18.8101	-1.52561	0.000232298
F234A_HUMAN	Protein FAM234A	22.1896	20.0075	-1.49345	0.000966037
TXTP_HUMAN	Tricarboxylate transport protein, mitochondrial	21.4406	19.3867	-1.45278	0.0249372
CDN1C_HUMAN	Cyclin-dependent kinase inhibitor 1C	18.9808	17.1894	-1.4302	0.000155803
CHSTB_HUMAN	Carbohydrate sulfotransferase 11	20.5745	18.6562	-1.41203	3.06942e-07
GOLI4_HUMAN	Golgi integral membrane protein 4	22.4816	20.4196	-1.3879	5.48928e-07
FXRD1_HUMAN	FAD-dependent oxidoreductase domain-containing protein 1	19.7165	17.9083	-1.38781	0.00144634
ADA1D_HUMAN	Alpha-1D adrenergic receptor	26.6361	24.2109	-1.37723	0.028766
KEAP1_HUMAN	Kelch-like ECH-associated protein 1	20.3521	18.5576	-1.33171	7.4289e-06
TMX4_HUMAN	Thioredoxin-related transmembrane protein 4	21.4604	19.581	-1.32218	0.000856373
CMTR2_HUMAN	Cap-specific mRNA (nucleoside-2'-O-)-methyltransferase 2	23.968	21.8947	-1.30527	0.023262
WNT5A_HUMAN	Protein Wnt-5a	20.1053	18.3696	-1.30251	0.00400405
ZFPL1_HUMAN	Zinc finger protein-like 1	18.5454	16.9495	-1.29824	0.0101228
PURA_HUMAN	Transcriptional activator protein Pur-alpha	21.9619	20.0754	-1.29572	0.0218938
NU133_HUMAN	Nuclear pore complex protein Nup133	21.7055	19.8878	-1.26177	6.87656e-05
NEP1_HUMAN	Ribosomal RNA small subunit methyltransferase NEP1	20.0198	18.3669	-1.24323	0.00789707
TIM14_HUMAN	Mitochondrial import inner membrane translocase subunit TIM14	20.5849	18.8952	-1.23566	4.43603e-05
XRN1_HUMAN	5'-3' exoribonuclease 1	19.7795	18.2137	-1.18986	7.01889e-06
AVEN_HUMAN	Cell death regulator Aven	21.5739	19.8879	-1.1739	0.023816
NT5D2_HUMAN	5'-nucleotidase domain-containing protein 2	19.1057	17.6231	-1.16535	0.00127438
GSTT1_HUMAN	Glutathione S-transferase theta-1	20.7283	19.127	-1.15989	0.0200883
AGO1_HUMAN	Protein argonaute-1	20.1665	18.6176	-1.15292	0.0166954
IN35_HUMAN	Interferon-induced 35 kDa protein	18.1694	16.7755	-1.15158	0.000114287
CDC5L_HUMAN	Cell division cycle 5-like protein	21.688	20.0517	-1.13173	5.5636e-08
MGT5A_HUMAN	Alpha-1,6-mannosylglycoprotein 6-beta-N-acetylglucosaminyltransferase A	19.2789	17.8388	-1.12009	7.17144e-06
HEBP1_HUMAN	Heme-binding protein 1	21.768	20.1725	-1.09815	0.0188737
ORC3_HUMAN	Origin recognition complex subunit 3	20.3807	18.8989	-1.08902	1.28149e-06
DHRS2_HUMAN	Dehydrogenase/reductase SDR family member 2, mitochondrial	21.2312	19.711	-1.07183	5.43836e-07
GALT7_HUMAN	N-acetylgalactosaminyltransferase 7	16.7301	15.5429	-1.06192	0.0427206
MLH1_HUMAN	DNA mismatch repair protein Mlh1	23.1522	21.5111	-1.06068	2.02151e-08
LYAG_HUMAN	Lysosomal alpha-glucosidase	21.4628	19.9429	-1.05964	0.000276892
RPB2_HUMAN	DNA-directed RNA polymerase II subunit RPB2	23.6851	22.0247	-1.04852	1.08802e-14
GNPAT_HUMAN	Dihydroxyacetone phosphate acyltransferase	19.8873	18.5111	-1.0346	0.00880792
PBIP1_HUMAN	Pre-B-cell leukemia transcription factor-interacting protein 1	20.1498	18.7614	-1.02999	6.93479e-08
OXSM_HUMAN	3-oxoacyl-[acyl-carrier-protein] synthase, mitochondrial	18.8546	17.5745	-1.01428	0.0197294
SORL_HUMAN	Sortilin-related receptor	23.4045	21.8248	-1.00815	9.4369e-15
KAT3_HUMAN	Kynurenine--oxoglutarate transaminase 3	21.3277	19.9068	-0.994667	0.000219345
EGLN_HUMAN	Endoglin	24.0278	22.4324	-0.991182	5.14491e-08
UBX11_HUMAN	UBX domain-containing protein 11	21.0885	19.701	-0.981878	0.00451997
STX5_HUMAN	Syntaxin-5	22.3824	20.9112	-0.980914	0.0304281
MAAI_HUMAN	Maleylacetoacetate isomerase	24.1769	22.5955	-0.975952	0.00135579
GCP3_HUMAN	Gamma-tubulin complex component 3	23.552	22.0379	-0.958596	0.0237006
RPB3_HUMAN	DNA-directed RNA polymerase II subunit RPB3	22.6788	21.265	-0.928634	2.00713e-07
SYAM_HUMAN	Alanine--tRNA ligase, mitochondrial	21.9641	20.6079	-0.919543	0.0145309
GSLG1_HUMAN	Golgi apparatus protein 1	24.4803	22.9708	-0.918159	2.45302e-09
SBP1_HUMAN	Selenium-binding protein 1	20.2188	18.999	-0.897747	0.00601176
LRSM1_HUMAN	E3 ubiquitin-protein ligase LRSAM1	19.6937	18.5132	-0.891767	2.68817e-07
XRCC1_HUMAN	DNA repair protein XRCC1	20.8016	19.5549	-0.891652	0.00011573
MAT1_HUMAN	CDK-activating kinase assembly factor MAT1	20.8395	19.6021	-0.883161	0.0392511
NACC1_HUMAN	Nucleus accumbens-associated protein 1	21.3819	20.1427	-0.86138	0.000481732
FARP1_HUMAN	FERM, RhoGEF and pleckstrin domain-containing protein 1	23.7692	22.429	-0.837232	0.00121855
F262_HUMAN	6-phosphofructo-2-kinase/fructose-2,6-bisphosphatase 2	18.7411	17.6867	-0.835374	0.0248566
TRIM3_HUMAN	Tripartite motif-containing protein 3	18.6096	17.5662	-0.832419	0.00602196
KIME_HUMAN	Mevalonate kinase	18.7838	17.7343	-0.829475	3.04499e-06
CIRBP_HUMAN	Cold-inducible RNA-binding protein	23.4973	22.1878	-0.827279	0.000849164
ASH2L_HUMAN	Set1/Ash2 histone methyltransferase complex subunit ASH2	19.2854	18.214	-0.824628	0.00108385
DPOA2_HUMAN	DNA polymerase alpha subunit B	23.3972	22.1021	-0.821541	0.0148804
PHKG2_HUMAN	Phosphorylase b kinase gamma catalytic chain, liver/testis isoform	19.5723	18.4907	-0.82017	0.000679422
SDHF2_HUMAN	Succinate dehydrogenase assembly factor 2, mitochondrial	21.0248	19.8641	-0.819242	0.000224121
DNMBP_HUMAN	Dynamin-binding protein	25.2765	23.891	-0.813302	0.0103097
ATP5S_HUMAN	ATP synthase subunit s, mitochondrial	22.0907	20.8821	-0.811679	0.00545675
HIP1_HUMAN	Huntingtin-interacting protein 1	19.6523	18.5826	-0.80746	0.000920735
WBP4_HUMAN	WW domain-binding protein 4	19.9914	18.9258	-0.790291	0.0105898
HIKES_HUMAN	Protein Hikeshi	19.3385	18.3122	-0.786705	0.00848039
RU1C_HUMAN	U1 small nuclear ribonucleoprotein C	23.3129	22.0759	-0.786555	0.000133915
QRIC1_HUMAN	Glutamine-rich protein 1	23.3591	22.1403	-0.773133	0.0384558
AKD1A_HUMAN	Ankyrin repeat and death domain-containing protein 1A	19.9172	18.8793	-0.77208	0.00132101
QSOX2_HUMAN	Sulfhydryl oxidase 2	22.6863	21.5094	-0.768582	0.0043969
RIOK2_HUMAN	Serine/threonine-protein kinase RIO2	22.1081	20.9689	-0.763221	6.11938e-07
ARM10_HUMAN	Armadillo repeat-containing protein 10	26.0126	24.6921	-0.751617	0.0240243
PSIP1_HUMAN	PC4 and SFRS1-interacting protein	21.3971	20.3211	-0.744398	0.0186737
CLAP2_HUMAN	CLIP-associating protein 2	20.5542	19.5231	-0.742502	0.00663432
P3H1_HUMAN	Prolyl 3-hydroxylase 1	21.3791	20.3118	-0.738827	0.00323445
TMF1_HUMAN	TATA element modulatory factor	21.9671	20.8716	-0.738009	0.0153949
NUD14_HUMAN	Uridine diphosphate glucose pyrophosphatase	23.5741	22.3994	-0.737381	0.0157928
AIMP2_HUMAN	Aminoacyl tRNA synthase complex-interacting multifunctional protein 2	23.1704	22.0181	-0.735923	0.0108282
MINP1_HUMAN	Multiple inositol polyphosphate phosphatase 1	21.2759	20.2197	-0.734557	3.32659e-06
GOGB1_HUMAN	Golgin subfamily B member 1	20.7409	19.7198	-0.728297	0.00199257
PDCD4_HUMAN	Programmed cell death protein 4	21.9547	20.8771	-0.726088	7.59918e-05
PGDH_HUMAN	15-hydroxyprostaglandin dehydrogenase [NAD(+)]	21.4001	20.3678	-0.713291	4.87311e-10
SMCA5_HUMAN	SWI/SNF-related matrix-associated actin-dependent regulator of chromatin subfamily A member 5	22.8896	21.7901	-0.710173	3.80152e-09
PARG_HUMAN	Poly(ADP-ribose) glycohydrolase	19.2792	18.3589	-0.705593	0.00470094
ARAP3_HUMAN	Arf-GAP with Rho-GAP domain, ANK repeat and PH domain-containing protein 3	20.3102	19.3488	-0.699606	0.00442768
PNKP_HUMAN	Bifunctional polynucleotide phosphatase/kinase	20.3102	19.3488	-0.699606	0.00442768
LGMN_HUMAN	Legumain	24.4924	23.3339	-0.699067	0.0091905
PPR21_HUMAN	Protein phosphatase 1 regulatory subunit 21	19.4824	18.5679	-0.693594	0.0013787
IFM2_HUMAN	Interferon-induced transmembrane protein 2	24.1371	23.0155	-0.686462	0.029768
COG8_HUMAN	Conserved oligomeric Golgi complex subunit 8	20.5681	19.6125	-0.686288	0.00971343
ITFG2_HUMAN	KICSTOR complex protein ITFG2	20.7525	19.7999	-0.67793	0.000814484
C2CD5_HUMAN	C2 domain-containing protein 5	20.2152	19.2893	-0.676455	0.00615203
NECT1_HUMAN	Nectin-1	21.1502	20.1971	-0.66524	1.92017e-08
WLS_HUMAN	Protein wntless homolog	23.6339	22.5697	-0.664701	0.0286613
CX6B1_HUMAN	Cytochrome c oxidase subunit 6B1	22.2319	21.2325	-0.663523	0.0318189
THOC2_HUMAN	THO complex subunit 2	20.4732	19.5712	-0.650072	6.5381e-05
CNO10_HUMAN	CCR4-NOT transcription complex subunit 10	20.0413	19.1585	-0.649915	0.00727248
HYES_HUMAN	Bifunctional epoxide hydrolase 2	20.902	19.9825	-0.64906	0.0236701
KCRS_HUMAN	Creatine kinase S-type, mitochondrial	22.8274	21.8276	-0.646172	6.9055e-05
CNOT2_HUMAN	CCR4-NOT transcription complex subunit 2	21.9031	20.9562	-0.637562	2.11118e-06
DPOG1_HUMAN	DNA polymerase subunit gamma-1	20.2221	19.348	-0.637498	0.0248038
TBCD_HUMAN	Tubulin-specific chaperone D	22.9738	21.9866	-0.633615	0.00663254
TNIK_HUMAN	TRAF2 and NCK-interacting protein kinase	20.9783	20.0809	-0.630737	1.78035e-05
RHG12_HUMAN	Rho GTPase-activating protein 12	17.7373	16.98	-0.629506	0.0176834
ARFRP_HUMAN	ADP-ribosylation factor-related protein 1	19.1489	18.3578	-0.60868	0.0265702
COQ8B_HUMAN	Atypical kinase COQ8B, mitochondrial	22.8459	21.903	-0.608043	6.85672e-05
F169A_HUMAN	Soluble lamin-associated protein of 75 kDa	20.1986	19.3662	-0.607125	0.00339333
APC5_HUMAN	Anaphase-promoting complex subunit 5	20.1711	19.3401	-0.60695	0.000207764
HBS1L_HUMAN	HBS1-like protein	21.4422	20.5597	-0.606332	0.00221899
MICA1_HUMAN	[F-actin]-monooxygenase MICAL1	20.3768	19.5491	-0.598291	0.000511072
FABD_HUMAN	Malonyl-CoA-acyl carrier protein transacylase, mitochondrial	25.2677	24.2479	-0.594363	0.00212316
EXOC2_HUMAN	Exocyst complex component 2	21.9345	21.056	-0.589708	0.0338552
CC186_HUMAN	Coiled-coil domain-containing protein 186	22.3252	21.4349	-0.587151	0.0281914
RL37A_HUMAN	60S ribosomal protein L37a	25.7024	24.6816	-0.584691	0.00112749
CAB45_HUMAN	45 kDa calcium-binding protein	22.0269	21.1574	-0.581032	2.79498e-05
TADBP_HUMAN	TAR DNA-binding protein 43	24.3506	23.3916	-0.579675	0.0322682
MA7D3_HUMAN	MAP7 domain-containing protein 3	19.2506	18.4938	-0.578633	0.00826893
PLRG1_HUMAN	Pleiotropic regulator 1	20.8699	20.0537	-0.575545	0.00158487
S30BP_HUMAN	SAP30-binding protein	21.9782	21.1391	-0.561594	8.46397e-05
RBP56_HUMAN	TATA-binding protein-associated factor 2N	25.2063	24.2456	-0.560629	0.0343767
RT30_HUMAN	39S ribosomal protein S30, mitochondrial	23.2338	22.3484	-0.560523	1.29281e-05
NELFE_HUMAN	Negative elongation factor E	21.7289	20.9194	-0.547726	0.000176947
SFR15_HUMAN	Splicing factor, arginine/serine-rich 15	22.6955	21.8503	-0.547541	0.000811167
RPR1A_HUMAN	Regulation of nuclear pre-mRNA domain-containing protein 1A	22.8545	22.0087	-0.544075	0.000278172
TM9S3_HUMAN	Transmembrane 9 superfamily member 3	23.1259	22.2731	-0.542055	0.0150177
MYADM_HUMAN	Myeloid-associated differentiation marker	25.3389	24.431	-0.526374	0.0252224
RLA1_HUMAN	60S acidic ribosomal protein P1	28.359	27.3512	-0.521986	0.00674496
DJC10_HUMAN	DnaJ homolog subfamily C member 10	17.5293	16.9088	-0.519898	0.034837
NPC2_HUMAN	Epididymal secretory protein E1	26.1378	25.2167	-0.51754	0.00225695
GTPBA_HUMAN	GTP-binding protein 10	20.5461	19.8242	-0.515973	0.0181299
NIT2_HUMAN	Omega-amidase NIT2	20.5315	19.8105	-0.515756	0.000606819
DCAF8_HUMAN	DDB1- and CUL4-associated factor 8	20.6077	19.8919	-0.510002	0.00143796
WAP53_HUMAN	Telomerase Cajal body protein 1	23.1311	22.3285	-0.509485	0.00163332
ACSA_HUMAN	Acetyl-coenzyme A synthetase, cytoplasmic	25.2843	24.4092	-0.508168	6.73787e-07
PTPRG_HUMAN	Receptor-type tyrosine-protein phosphatase gamma	20.9667	20.2415	-0.507846	0.000732231
CK054_HUMAN	Ester hydrolase C11orf54	25.0706	24.2106	-0.503621	0.00730918
EED_HUMAN	Polycomb protein EED	20.8014	20.0887	-0.502994	0.00336389
GMFG_HUMAN	Glia maturation factor gamma	23.4712	22.672	-0.499775	0.0273214
HDGR2_HUMAN	Hepatoma-derived growth factor-related protein 2	21.4056	20.6773	-0.499373	6.54416e-05
RT05_HUMAN	28S ribosomal protein S5, mitochondrial	21.6577	20.9286	-0.494023	0.00641508
ETS1_HUMAN	Protein C-ets-1	19.2065	18.5614	-0.492887	0.00360796
PDLI2_HUMAN	PDZ and LIM domain protein 2	21.537	20.8149	-0.491989	0.00730618
TM9S4_HUMAN	Transmembrane 9 superfamily member 4	24.1675	23.3588	-0.490996	0.016535
CATZ_HUMAN	Cathepsin Z	28.5428	27.5893	-0.490218	4.39305e-10
SYMPK_HUMAN	Symplekin	22.9792	22.2234	-0.482498	0.000290259
MFF_HUMAN	Mitochondrial fission factor	23.8323	23.0508	-0.481018	4.54631e-06
ERBIN_HUMAN	Erbin	20.6462	19.9809	-0.472521	0.00843724
RIPR2_HUMAN	Rho family-interacting cell polarization regulator 2	21.4343	20.7468	-0.470351	0.000731262
AKT2_HUMAN	RAC-beta serine/threonine-protein kinase	27.8852	26.9923	-0.469536	0.00031535
QORL1_HUMAN	Quinone oxidoreductase-like protein 1	21.4529	20.7706	-0.466303	0.000165485
UBE2T_HUMAN	Ubiquitin-conjugating enzyme E2 T	23.1323	22.4037	-0.461709	0.00142976
UBP22_HUMAN	Ubiquitin carboxyl-terminal hydrolase 22	22.4303	21.7339	-0.455012	0.0354543
HMGCL_HUMAN	Hydroxymethylglutaryl-CoA lyase, mitochondrial	23.6898	22.9551	-0.454513	4.68402e-09
FN3K_HUMAN	Fructosamine-3-kinase	22.0678	21.39	-0.45006	0.0460336
P3C2A_HUMAN	Phosphatidylinositol 4-phosphate 3-kinase C2 domain-containing subunit alpha	23.0884	22.3805	-0.449267	0.0345902
SKAP_HUMAN	Small kinetochore-associated protein	25.6119	24.8274	-0.448856	0.00778342
CBPD_HUMAN	Carboxypeptidase D	23.5613	22.8429	-0.446782	3.87972e-09
CHD4_HUMAN	Chromodomain-helicase-DNA-binding protein 4	25.4204	24.6493	-0.444368	0.000485647
PERF_HUMAN	Perforin-1	21.6327	20.9792	-0.442522	0.01784
VAT1L_HUMAN	Synaptic vesicle membrane protein VAT-1 homolog-like	22.0792	21.4127	-0.44223	0.00737799
TRUB1_HUMAN	Probable tRNA pseudouridine synthase 1	22.3923	21.7172	-0.441659	0.00634392
HACL1_HUMAN	2-hydroxyacyl-CoA lyase 1	22.6298	21.9489	-0.440737	0.0118275
WDR54_HUMAN	WD repeat-containing protein 54	21.9787	21.3194	-0.439384	1.20803e-06
LZTS1_HUMAN	Leucine zipper putative tumor suppressor 1	23.0649	22.3744	-0.438537	0.0052271
GDE_HUMAN	Glycogen debranching enzyme	21.6711	21.023	-0.438021	0.0432354
CHAP1_HUMAN	Chromosome alignment-maintaining phosphoprotein 1	21.3578	20.7226	-0.435558	0.00473636
CTF18_HUMAN	Chromosome transmission fidelity protein 18 homolog	20.5858	19.9761	-0.433676	0.01559
GOPC_HUMAN	Golgi-associated PDZ and coiled-coil motif-containing protein	24.5792	23.8525	-0.432941	0.0179101
BTAF1_HUMAN	TATA-binding protein-associated factor 172	22.6383	21.9722	-0.430896	0.0403248
NEUR1_HUMAN	Sialidase-1	20.6796	20.0784	-0.425607	0.00044875
SCLY_HUMAN	Selenocysteine lyase	19.5806	19.0149	-0.422962	0.0322067
BRAP_HUMAN	BRCA1-associated protein	19.5451	18.9824	-0.421408	0.0248099
MFR1L_HUMAN	Mitochondrial fission regulator 1-like	20.4871	19.8984	-0.420603	5.45755e-06
FLOT2_HUMAN	Flotillin-2	22.0903	21.4603	-0.417413	0.00702782
BTF3_HUMAN	Transcription factor BTF3	28.0024	27.2045	-0.417048	0.000950055
SAR1A_HUMAN	GTP-binding protein SAR1a	25.8042	25.0697	-0.416616	0.0311809
ABCD1_HUMAN	ATP-binding cassette sub-family D member 1	22.4425	21.8042	-0.416217	0.0147876
METL9_HUMAN	Methyltransferase-like protein 9	20.7904	20.202	-0.414147	0.0163339
DYR_HUMAN	Dihydrofolate reductase	25.6365	24.922	-0.407795	4.93624e-08
MRC2_HUMAN	C-type mannose receptor 2	23.8514	23.1896	-0.405953	4.41007e-06
WDR70_HUMAN	WD repeat-containing protein 70	21.76	21.1569	-0.405479	2.44032e-06
TDRKH_HUMAN	Tudor and KH domain-containing protein	19.9333	19.3831	-0.403836	0.00127451
SPC25_HUMAN	Kinetochore protein Spc25	24.79	24.1078	-0.402591	7.07686e-09
RPP30_HUMAN	Ribonuclease P protein subunit p30	19.6729	19.1342	-0.400592	0.0416243
FA46B_HUMAN	Putative nucleotidyltransferase FAM46B	23.439	22.7993	-0.399225	4.09499e-05
NONO_HUMAN	Non-POU domain-containing octamer-binding protein	25.872	25.1694	-0.397198	0.000140007
H2A1D_HUMAN	Histone H2A type 1-D	25.2063	24.5224	-0.396837	0.00247723
RM17_HUMAN	39S ribosomal protein L17, mitochondrial	22.1088	21.511	-0.395457	0.0348399
HNRPC_HUMAN	Heterogeneous nuclear ribonucleoproteins C1/C2	26.1407	25.4367	-0.393877	2.7717e-07
HNRLL_HUMAN	Heterogeneous nuclear ribonucleoprotein L-like	21.9182	21.329	-0.393122	0.000625318
MYO1D_HUMAN	Unconventional myosin-Id	23.9505	23.3122	-0.389703	0.0128631
PCID2_HUMAN	PCI domain-containing protein 2	23.4185	22.8007	-0.385702	0.00848613
CD2_HUMAN	T-cell surface antigen CD2	29.3567	28.583	-0.385283	0.000825726
HDAC2_HUMAN	Histone deacetylase 2	22.6152	22.0216	-0.383744	0.000419587
AIDA_HUMAN	Axin interactor, dorsalization-associated protein	21.8305	21.2619	-0.380713	0.00455404
WDR61_HUMAN	WD repeat-containing protein 61	24.5363	23.9014	-0.378214	1.00789e-06
RMD5A_HUMAN	Protein RMD5 homolog A	22.3971	21.819	-0.377321	0.0129146
DEOC_HUMAN	Deoxyribose-phosphate aldolase	25.3925	24.7392	-0.376016	0.0260522
CGBP1_HUMAN	CGG triplet repeat-binding protein 1	21.0878	20.5466	-0.375139	2.4214e-05
PACN3_HUMAN	Protein kinase C and casein kinase substrate in neurons protein 3	22.5058	21.931	-0.373291	0.000692165
DDX46_HUMAN	Probable ATP-dependent RNA helicase DDX46	23.8102	23.2076	-0.3698	0.00138747
CD47_HUMAN	Leukocyte surface antigen CD47	21.061	20.5316	-0.367307	0.0171281
SCO1_HUMAN	Protein SCO1 homolog, mitochondrial	22.1601	21.6107	-0.362155	0.00226832
IFT46_HUMAN	Intraflagellar transport protein 46 homolog	19.4585	18.9762	-0.362073	0.0120407
ASF1A_HUMAN	Histone chaperone ASF1A	22.4754	21.921	-0.36032	0.0349375
PAIP2_HUMAN	Polyadenylate-binding protein-interacting protein 2	26.216	25.5694	-0.360297	0.00194179
SOAT1_HUMAN	Sterol O-acyltransferase 1	20.5252	20.0258	-0.355417	0.00770584
PPAL_HUMAN	Lysosomal acid phosphatase	21.9761	21.4432	-0.354196	0.000763766
WDR6_HUMAN	WD repeat-containing protein 6	21.6585	21.1342	-0.353521	0.0480755
B2L15_HUMAN	Bcl-2-like protein 15	24.6522	24.058	-0.35201	0.0101594
SNX17_HUMAN	Sorting nexin-17	24.0801	23.5002	-0.351659	0.000903828
AKT1_HUMAN	RAC-alpha serine/threonine-protein kinase	28.2181	27.5414	-0.350213	0.000743331
CP070_HUMAN	UPF0183 protein C16orf70	20.4894	20.0032	-0.346469	4.42189e-05
ADDG_HUMAN	Gamma-adducin	23.9222	23.3558	-0.345682	7.71731e-05
AACS_HUMAN	Acetoacetyl-CoA synthetase	22.7657	22.2312	-0.342772	0.00105352
ZWILC_HUMAN	Protein zwilch homolog	20.8488	20.3616	-0.341153	0.000116956
KDM3B_HUMAN	Lysine-specific demethylase 3B	25.5843	24.9869	-0.340834	1.95722e-05
CNOT1_HUMAN	CCR4-NOT transcription complex subunit 1	21.3272	20.8309	-0.339653	0.0201404
ITB5_HUMAN	Integrin beta-5	25.9307	25.3292	-0.338551	1.02338e-05
LAMB1_HUMAN	Laminin subunit beta-1	23.1524	22.6155	-0.338523	8.71416e-06
MTA2_HUMAN	Metastasis-associated protein MTA2	23.5602	23.0139	-0.338481	0.00110194
TRADD_HUMAN	Tumor necrosis factor receptor type 1-associated DEATH domain protein	21.3974	20.9042	-0.336368	1.70551e-05
IPO9_HUMAN	Importin-9	23.767	23.2254	-0.332571	0.0366287
RN181_HUMAN	E3 ubiquitin-protein ligase RNF181	23.3128	22.7817	-0.332463	9.69389e-06
RASA3_HUMAN	Ras GTPase-activating protein 3	23.2649	22.7375	-0.330767	1.1888e-06
5NTD_HUMAN	5'-nucleotidase	24.3467	23.7961	-0.329965	2.11795e-05
PCY2_HUMAN	Ethanolamine-phosphate cytidylyltransferase	24.2648	23.7167	-0.329622	0.0113273
CHK2_HUMAN	Serine/threonine-protein kinase Chk2	22.4898	21.9871	-0.326132	0.000908891
SAM50_HUMAN	Sorting and assembly machinery component 50 homolog	22.0067	21.5187	-0.323486	0.00716573
FBW1A_HUMAN	F-box/WD repeat-containing protein 1A	19.5811	19.1513	-0.320148	0.00556452
MIGA1_HUMAN	Mitoguardin 1	19.5861	19.157	-0.319549	7.26281e-05
C2AIL_HUMAN	CDKN2AIP N-terminal-like protein	23.0774	22.5742	-0.31809	0.00200323
ARF1_HUMAN	ADP-ribosylation factor 1	26.8648	26.2807	-0.317096	0.0456078
DHX9_HUMAN	ATP-dependent RNA helicase A	26.401	25.8286	-0.316201	0.000120116
ZW10_HUMAN	Centromere/kinetochore protein zw10 homolog	27.0262	26.4408	-0.315938	0.00360901
GAMT_HUMAN	Guanidinoacetate N-methyltransferase	23.5978	23.0868	-0.315866	0.0166002
DLGP5_HUMAN	Disks large-associated protein 5	22.9023	22.4076	-0.314996	0.0034128
SUSD2_HUMAN	Sushi domain-containing protein 2	24.0797	23.564	-0.312333	2.49932e-06
ZO1_HUMAN	Tight junction protein ZO-1	21.5709	21.1094	-0.312029	0.0134914
DPOD1_HUMAN	DNA polymerase delta catalytic subunit	26.0826	25.5252	-0.311663	1.70027e-07
K1C9_HUMAN	Keratin, type I cytoskeletal 9	28.9006	28.2836	-0.311319	0.0123648
L1CAM_HUMAN	Neural cell adhesion molecule L1	23.2178	22.7246	-0.309787	3.60249e-07
RT21_HUMAN	28S ribosomal protein S21, mitochondrial	21.3483	20.8976	-0.307809	0.0147765
RS23_HUMAN	40S ribosomal protein S23	27.8079	27.2277	-0.304231	0.0045757
TOR1B_HUMAN	Torsin-1B	21.5911	21.1421	-0.303212	0.0201155
OSBL8_HUMAN	Oxysterol-binding protein-related protein 8	24.5504	24.0408	-0.302602	1.09875e-05
RBBP9_HUMAN	Putative hydrolase RBBP9	22.8114	22.3382	-0.302451	0.00209643
SDF2_HUMAN	Stromal cell-derived factor 2	22.1451	21.687	-0.301584	0.00827701
PICAL_HUMAN	Phosphatidylinositol-binding clathrin assembly protein	25.4228	24.8989	-0.300413	0.0337163
SMAD3_HUMAN	Mothers against decapentaplegic homolog 3	23.1867	22.7088	-0.300405	0.0197693
PALD_HUMAN	Paladin	25.3905	24.8698	-0.298916	2.81051e-05
MATR3_HUMAN	Matrin-3	25.7885	25.2612	-0.298046	0.0055942
ATG7_HUMAN	Ubiquitin-like modifier-activating enzyme ATG7	21.3251	20.8922	-0.295878	0.0144271
MICU2_HUMAN	Calcium uptake protein 2, mitochondrial	20.7873	20.368	-0.294025	0.000358103
RRBP1_HUMAN	Ribosome-binding protein 1	27.3069	26.7565	-0.293749	0.000402461
RNH2A_HUMAN	Ribonuclease H2 subunit A	26.4509	25.9188	-0.293147	9.74923e-08
ILF2_HUMAN	Interleukin enhancer-binding factor 2	27.3167	26.771	-0.291125	0.00108948
QORX_HUMAN	Quinone oxidoreductase PIG3	23.1119	22.6523	-0.28974	0.000516199
FKBP9_HUMAN	Peptidyl-prolyl cis-trans isomerase FKBP9	23.9032	23.4286	-0.28937	0.000309165
WDHD1_HUMAN	WD repeat and HMG-box DNA-binding protein 1	24.7509	24.2628	-0.287362	0.00780244
ITAV_HUMAN	Integrin alpha-V	25.6958	25.19	-0.286812	0.000123251
TPP1_HUMAN	Tripeptidyl-peptidase 1	25.2728	24.7754	-0.28674	8.79966e-05
RB_HUMAN	Retinoblastoma-associated protein	24.0935	23.62	-0.286354	0.000541089
ELP4_HUMAN	Elongator complex protein 4	24.6721	24.1876	-0.286115	1.93202e-05
RS27L_HUMAN	40S ribosomal protein S27-like	23.9284	23.4588	-0.285916	0.00518857
BDH2_HUMAN	3-hydroxybutyrate dehydrogenase type 2	22.1519	21.7192	-0.284606	8.38721e-05
HEXA_HUMAN	Beta-hexosaminidase subunit alpha	23.7411	23.2775	-0.284465	1.65652e-06
PHLB2_HUMAN	Pleckstrin homology-like domain family B member 2	22.4608	22.0239	-0.283427	4.14629e-07
TRI32_HUMAN	E3 ubiquitin-protein ligase TRIM32	22.6536	22.2179	-0.280218	1.06971e-06
ATPF2_HUMAN	ATP synthase mitochondrial F1 complex assembly factor 2	22.8338	22.3948	-0.280078	0.0103116
ODB2_HUMAN	Lipoamide acyltransferase component of branched-chain alpha-keto acid dehydrogenase complex, mitochondrial	22.3133	21.8856	-0.279205	0.00619228
LORF1_HUMAN	LINE-1 retrotransposable element ORF1 protein	23.7836	23.3283	-0.278808	0.000777012
CLAP1_HUMAN	CLIP-associating protein 1	22.0822	21.6608	-0.277953	0.00385121
RA51C_HUMAN	DNA repair protein RAD51 homolog 3	22.6377	22.2099	-0.275287	3.40958e-05
CD81_HUMAN	CD81 antigen	27.3534	26.8369	-0.275012	0.0216033
BDH_HUMAN	D-beta-hydroxybutyrate dehydrogenase, mitochondrial	25.6302	25.1473	-0.274369	0.0172008
RUXE_HUMAN	Small nuclear ribonucleoprotein E	25.2971	24.8208	-0.274222	0.0284744
XRCC4_HUMAN	DNA repair protein XRCC4	21.4497	21.0505	-0.271007	5.08489e-05
DNMT1_HUMAN	DNA (cytosine-5)-methyltransferase 1	22.8078	22.3835	-0.270887	4.64771e-05
KS6A4_HUMAN	Ribosomal protein S6 kinase alpha-4	21.4856	21.0884	-0.269255	0.000297289
PPCEL_HUMAN	Prolyl endopeptidase-like	23.1357	22.7091	-0.268498	0.0154795
ITA6_HUMAN	Integrin alpha-6	24.9557	24.4957	-0.268427	1.10911e-07
RM53_HUMAN	39S ribosomal protein L53, mitochondrial	21.6337	21.2351	-0.268329	0.0161621
NELFB_HUMAN	Negative elongation factor B	22.2414	21.8325	-0.267651	0.025043
STAT6_HUMAN	Signal transducer and activator of transcription 6	23.4665	23.0363	-0.266905	0.000810514
CAPR1_HUMAN	Caprin-1	27.43	26.9314	-0.264644	3.62347e-07
VP33A_HUMAN	Vacuolar protein sorting-associated protein 33A	21.8732	21.479	-0.262397	0.0363273
PTPRJ_HUMAN	Receptor-type tyrosine-protein phosphatase eta	23.5388	23.1158	-0.261649	0.000107574
SFPQ_HUMAN	Splicing factor, proline- and glutamine-rich	23.1576	22.745	-0.259367	0.0020321
GOLM1_HUMAN	Golgi membrane protein 1	22.9067	22.4988	-0.259235	6.00394e-05
TM165_HUMAN	Transmembrane protein 165	23.5153	23.0965	-0.259225	0.000138365
ACOT9_HUMAN	Acyl-coenzyme A thioesterase 9, mitochondrial	24.6252	24.1879	-0.258496	0.0281778
KCC2G_HUMAN	Calcium/calmodulin-dependent protein kinase type II subunit gamma	23.1086	22.6983	-0.258429	0.0140191
DCUP_HUMAN	Uroporphyrinogen decarboxylase	25.7822	25.3248	-0.258211	1.93328e-05
TANC1_HUMAN	Protein TANC1	23.827	23.4053	-0.257597	0.0467209
GBB1_HUMAN	Guanine nucleotide-binding protein G(I)/G(S)/G(T) subunit beta-1	28.2811	27.781	-0.257377	0.000372139
SPC24_HUMAN	Kinetochore protein Spc24	25.0204	24.5789	-0.256821	0.000347927
RM19_HUMAN	39S ribosomal protein L19, mitochondrial	22.8107	22.4083	-0.256768	0.0018943
CWC25_HUMAN	Pre-mRNA-splicing factor CWC25 homolog	21.9449	21.5587	-0.256176	6.47447e-05
TLE3_HUMAN	Transducin-like enhancer protein 3	25.2466	24.803	-0.255737	4.17262e-06
ITA3_HUMAN	Integrin alpha-3	26.0556	25.5985	-0.255324	0.015438
PLOD1_HUMAN	Procollagen-lysine,2-oxoglutarate 5-dioxygenase 1	25.5838	25.1368	-0.254258	9.144e-05
GGH_HUMAN	Gamma-glutamyl hydrolase	25.6459	25.198	-0.254182	0.00802664
MUTA_HUMAN	Methylmalonyl-CoA mutase, mitochondrial	25.2191	24.779	-0.25398	1.01858e-05
GNAI2_HUMAN	Guanine nucleotide-binding protein G(i) subunit alpha-2	28.3103	27.8174	-0.253389	0.000358553
DDX6_HUMAN	Probable ATP-dependent RNA helicase DDX6	26.0945	25.6407	-0.253065	0.00385577
PARP1_HUMAN	Poly [ADP-ribose] polymerase 1	25.7616	25.3152	-0.252189	1.2238e-08
FBN3_HUMAN	Fibrillin-3	27.9668	27.4827	-0.251942	0.0385114
REN3B_HUMAN	Regulator of nonsense transcripts 3B	20.1801	19.8315	-0.251417	0.00303343
LAMC1_HUMAN	Laminin subunit gamma-1	22.9177	22.5232	-0.250482	2.85726e-05
ARC1A_HUMAN	Actin-related protein 2/3 complex subunit 1A	25.4768	25.0383	-0.250478	0.00474657
FAM3C_HUMAN	Protein FAM3C	22.8809	22.4895	-0.248922	0.00306101
SPAS2_HUMAN	Spermatogenesis-associated serine-rich protein 2	22.0364	21.6615	-0.247552	0.00594038
BAP18_HUMAN	Chromatin complexes subunit BAP18	23.6807	23.2781	-0.247417	8.80945e-07
U520_HUMAN	U5 small nuclear ribonucleoprotein 200 kDa helicase	25.3219	24.8918	-0.247129	0.00747865
DIP2B_HUMAN	Disco-interacting protein 2 homolog B	25.5411	25.1079	-0.246785	0.0154608
CG050_HUMAN	Uncharacterized protein C7orf50	23.7634	23.3621	-0.245702	1.10228e-05
COG4_HUMAN	Conserved oligomeric Golgi complex subunit 4	21.8457	21.478	-0.24489	0.00893807
COMD3_HUMAN	COMM domain-containing protein 3	20.7617	20.4124	-0.244782	0.0428697
RASA1_HUMAN	Ras GTPase-activating protein 1	20.2393	19.8997	-0.244121	0.00336123
RETR3_HUMAN	Reticulophagy regulator 3	21.7529	21.388	-0.244049	0.00361982
PAPOA_HUMAN	Poly(A) polymerase alpha	26.1207	25.6857	-0.24229	1.79127e-06
MTMR1_HUMAN	Myotubularin-related protein 1	21.097	20.7474	-0.241078	0.0117518
CMIP_HUMAN	C-Maf-inducing protein	21.8798	21.5197	-0.239419	0.0315554
KIF4A_HUMAN	Chromosome-associated kinesin KIF4A	27.8366	27.3794	-0.238915	0.000476424
STAT2_HUMAN	Signal transducer and activator of transcription 2	23.7402	23.3506	-0.238691	5.71501e-06
ICT1_HUMAN	Peptidyl-tRNA hydrolase ICT1, mitochondrial	23.5058	23.1208	-0.238286	0.00317197
IBP7_HUMAN	Insulin-like growth factor-binding protein 7	23.0381	22.6618	-0.237625	0.0112764
RM13_HUMAN	39S ribosomal protein L13, mitochondrial	24.2629	23.8702	-0.235409	5.02902e-05
TMED4_HUMAN	Transmembrane emp24 domain-containing protein 4	25.499	25.0866	-0.235247	0.00120967
SMYD5_HUMAN	SET and MYND domain-containing protein 5	20.9383	20.6003	-0.234788	0.026636
SPAG5_HUMAN	Sperm-associated antigen 5	22.1082	21.7546	-0.232641	0.00716042
NPTN_HUMAN	Neuroplastin	23.6116	23.2367	-0.230924	0.00966296
P53_HUMAN	Cellular tumor antigen p53	25.266	24.8657	-0.230397	3.72235e-05
PRKDC_HUMAN	DNA-dependent protein kinase catalytic subunit	27.0617	26.6352	-0.229168	0.00928445
NCALD_HUMAN	Neurocalcin-delta	25.2203	24.8237	-0.228663	0.00205234
NU107_HUMAN	Nuclear pore complex protein Nup107	21.0047	20.6805	-0.224415	0.000833979
U2AF1_HUMAN	Splicing factor U2AF 35 kDa subunit	26.3719	25.9662	-0.223628	0.000629822
PRI1_HUMAN	DNA primase small subunit	23.6061	23.2448	-0.222544	2.30239e-06
FLOT1_HUMAN	Flotillin-1	23.6977	23.3363	-0.221699	0.00887616
DX39A_HUMAN	ATP-dependent RNA helicase DDX39A	28.8537	28.4145	-0.221296	0.0187495
SYPM_HUMAN	Probable proline--tRNA ligase, mitochondrial	21.5012	21.174	-0.221199	0.0361822
NS1BP_HUMAN	Influenza virus NS1A-binding protein	26.2934	25.8955	-0.220016	0.000208665
ADDA_HUMAN	Alpha-adducin	23.3648	23.0113	-0.219941	1.16866e-05
TTC37_HUMAN	Tetratricopeptide repeat protein 37	22.9362	22.5895	-0.219731	0.042201
OCAD2_HUMAN	OCIA domain-containing protein 2	23.3737	23.0223	-0.21856	0.000386019
YMEL1_HUMAN	ATP-dependent zinc metalloprotease YME1L1	23.1309	22.784	-0.217981	0.013102
GTF2I_HUMAN	General transcription factor II-I	26.6702	26.2719	-0.217112	3.34778e-05
DNJA4_HUMAN	DnaJ homolog subfamily A member 4	23.4029	23.0558	-0.215578	0.0483212
PPGB_HUMAN	Lysosomal protective protein	26.3067	25.9192	-0.214116	3.70048e-07
ODBA_HUMAN	2-oxoisovalerate dehydrogenase subunit alpha, mitochondrial	24.0413	23.6872	-0.214055	0.0136068
PMVK_HUMAN	Phosphomevalonate kinase	24.0564	23.7037	-0.213107	0.00822797
ES1_HUMAN	ES1 protein homolog, mitochondrial	27.2289	26.8311	-0.212281	0.00580976
GAK_HUMAN	Cyclin-G-associated kinase	22.9797	22.6442	-0.212203	0.0303463
NICA_HUMAN	Nicastrin	22.5451	22.216	-0.21215	0.010416
DX39B_HUMAN	Spliceosome RNA helicase DDX39B	29.1572	28.7367	-0.209597	0.0264952
RABL6_HUMAN	Rab-like protein 6	21.1603	20.8622	-0.204677	4.30365e-05
CYB5B_HUMAN	Cytochrome b5 type B	29.66	29.2446	-0.203476	0.00530334
LARP7_HUMAN	La-related protein 7	22.5872	22.2731	-0.202063	0.00244138
SLD5_HUMAN	DNA replication complex GINS protein SLD5	23.9139	23.5843	-0.200233	0.00052942
CCAR2_HUMAN	Cell cycle and apoptosis regulator protein 2	27.101	26.73	-0.198878	7.94261e-06
PIMT_HUMAN	Protein-L-isoaspartate(D-aspartate) O-methyltransferase	27.0088	26.6421	-0.19726	0.0258459
GOGA2_HUMAN	Golgin subfamily A member 2	21.9234	21.6261	-0.196944	0.0366819
EMC2_HUMAN	ER membrane protein complex subunit 2	20.094	19.8229	-0.195977	0.0464292
GPC4_HUMAN	Glypican-4	26.6895	26.3295	-0.195936	0.000643337
ABHDB_HUMAN	Protein ABHD11	23.9235	23.602	-0.195205	0.000524062
NUP62_HUMAN	Nuclear pore glycoprotein p62	24.0091	23.6885	-0.193914	0.0238843
RT09_HUMAN	28S ribosomal protein S9, mitochondrial	22.834	22.5302	-0.193221	0.0217378
ACY1_HUMAN	Aminoacylase-1	25.6341	25.2934	-0.193042	0.0410242
NTPCR_HUMAN	Cancer-related nucleoside-triphosphatase	22.522	22.2232	-0.192682	0.00291466
WDR82_HUMAN	WD repeat-containing protein 82	23.8247	23.5096	-0.192112	0.0129368
PRP19_HUMAN	Pre-mRNA-processing factor 19	28.0955	27.7243	-0.19186	3.31129e-09
IFT25_HUMAN	Intraflagellar transport protein 25 homolog	23.0475	22.7442	-0.19111	0.00714018
PHF6_HUMAN	PHD finger protein 6	24.4165	24.0952	-0.191081	4.76859e-06
WIPI2_HUMAN	WD repeat domain phosphoinositide-interacting protein 2	24.2951	23.9758	-0.19088	1.25053e-05
GMPPA_HUMAN	Mannose-1-phosphate guanyltransferase alpha	23.9409	23.6264	-0.19076	0.00547055
ST1A1_HUMAN	Sulfotransferase 1A1	25.8169	25.4786	-0.190294	0.000626924
CBX5_HUMAN	Chromobox protein homolog 5	26.8343	26.4828	-0.190257	0.00111175
NU155_HUMAN	Nuclear pore complex protein Nup155	24.4574	24.1373	-0.190099	0.0051595
ROA3_HUMAN	Heterogeneous nuclear ribonucleoprotein A3	26.8662	26.5152	-0.189713	0.0295628
S38A2_HUMAN	Sodium-coupled neutral amino acid transporter 2	22.0866	21.7982	-0.189625	7.77147e-07
MYO5A_HUMAN	Unconventional myosin-Va	22.5419	22.25	-0.188077	0.0127817
PRAF1_HUMAN	Prenylated Rab acceptor protein 1	21.6574	21.377	-0.188013	0.0351996
MLEC_HUMAN	Malectin	25.7267	25.3938	-0.187937	0.0355526
HNRPM_HUMAN	Heterogeneous nuclear ribonucleoprotein M	25.7295	25.3989	-0.186557	0.0037893
RT15_HUMAN	28S ribosomal protein S15, mitochondrial	22.3376	22.0528	-0.185146	0.000156591
RM38_HUMAN	39S ribosomal protein L38, mitochondrial	21.6982	21.4225	-0.184458	0.0291618
EXOC4_HUMAN	Exocyst complex component 4	24.1354	23.8307	-0.183253	0.0158421
RM37_HUMAN	39S ribosomal protein L37, mitochondrial	24.9409	24.6271	-0.182677	8.47428e-06
KTN1_HUMAN	Kinectin	26.5337	26.2001	-0.182564	0.00182638
DDX42_HUMAN	ATP-dependent RNA helicase DDX42	26.9834	26.6443	-0.182453	0.000243768
CYR61_HUMAN	Protein CYR61	26.7117	26.3774	-0.181701	0.0045491
RM44_HUMAN	39S ribosomal protein L44, mitochondrial	24.8323	24.522	-0.181375	0.00313499
SCAM2_HUMAN	Secretory carrier-associated membrane protein 2	23.4262	23.137	-0.179246	0.048945
MOV10_HUMAN	Putative helicase MOV-10	22.058	21.7877	-0.177835	0.00179154
PDPR_HUMAN	Pyruvate dehydrogenase phosphatase regulatory subunit, mitochondrial	23.154	22.8732	-0.176077	0.00597851
NPM_HUMAN	Nucleophosmin	28.7753	28.4278	-0.175292	9.53518e-07
CATD_HUMAN	Cathepsin D	29.6364	29.2786	-0.175237	0.00205308
RPIA_HUMAN	Ribose-5-phosphate isomerase	26.1656	25.8498	-0.175176	0.0180866
DOCK9_HUMAN	Dedicator of cytokinesis protein 9	24.4795	24.1842	-0.17514	0.0175058
G3BP1_HUMAN	Ras GTPase-activating protein-binding protein 1	29.1984	28.8463	-0.175045	2.47251e-05
TIA1_HUMAN	Nucleolysin TIA-1 isoform p40	24.2576	23.967	-0.173884	0.00345057
PCIF1_HUMAN	Phosphorylated CTD-interacting factor 1	22.1589	21.8935	-0.173811	0.027443
SCOC_HUMAN	Short coiled-coil protein	20.7126	20.4649	-0.173581	0.047225
SEM5B_HUMAN	Semaphorin-5B	26.1358	25.8242	-0.17301	1.06972e-05
COX2_HUMAN	Cytochrome c oxidase subunit 2	25.5413	25.2379	-0.172402	0.00405825
UFL1_HUMAN	E3 UFM1-protein ligase 1	22.2864	22.0293	-0.167399	0.0010751
SYUG_HUMAN	Gamma-synuclein	20.2821	20.0482	-0.16737	0.000494152
HPCL1_HUMAN	Hippocalcin-like protein 1	24.9242	24.637	-0.167243	0.00397174
NOMO1_HUMAN	Nodal modulator 1	25.3908	25.0984	-0.16711	0.0366716
WDR26_HUMAN	WD repeat-containing protein 26	23.241	22.9772	-0.164732	0.00327643
TAB1_HUMAN	TGF-beta-activated kinase 1 and MAP3K7-binding protein 1	22.7805	22.5225	-0.164286	0.000124884
LSR_HUMAN	Lipolysis-stimulated lipoprotein receptor	20.7697	20.5347	-0.16413	0.000567747
WDR48_HUMAN	WD repeat-containing protein 48	21.3495	21.1085	-0.163798	0.0339777
VIGLN_HUMAN	Vigilin	27.5368	27.226	-0.163745	0.000784107
ENY2_HUMAN	Transcription and mRNA export factor ENY2	22.1104	21.862	-0.16303	0.00406943
IF4A3_HUMAN	Eukaryotic initiation factor 4A-III	29.1692	28.8447	-0.161403	0.000140479
PLCG1_HUMAN	1-phosphatidylinositol 4,5-bisphosphate phosphodiesterase gamma-1	28.3817	28.0666	-0.161091	0.0275757
PELO_HUMAN	Protein pelota homolog	20.4134	20.1892	-0.159331	0.00478775
DYL1_HUMAN	Dynein light chain 1, cytoplasmic	27.7314	27.4273	-0.15907	0.000851763
KS6A5_HUMAN	Ribosomal protein S6 kinase alpha-5	22.5357	22.2891	-0.158758	0.000396971
RM03_HUMAN	39S ribosomal protein L3, mitochondrial	25.3118	25.0352	-0.158517	0.00263825
DLDH_HUMAN	Dihydrolipoyl dehydrogenase, mitochondrial	27.5917	27.2903	-0.158497	0.0181159
CE022_HUMAN	UPF0489 protein C5orf22	21.3916	21.159	-0.15773	0.0209516
B3GLT_HUMAN	Beta-1,3-glucosyltransferase	22.8875	22.6392	-0.157407	0.0403656
KIF15_HUMAN	Kinesin-like protein KIF15	24.5146	24.2509	-0.156047	0.000532696
HSDL2_HUMAN	Hydroxysteroid dehydrogenase-like protein 2	25.8151	25.538	-0.155708	5.18005e-07
NIT1_HUMAN	Deaminated glutathione amidase	22.3521	22.1122	-0.155703	0.0330317
CDK6_HUMAN	Cyclin-dependent kinase 6	24.2134	23.9537	-0.155604	0.00705018
DC1I2_HUMAN	Cytoplasmic dynein 1 intermediate chain 2	27.194	26.9032	-0.155136	0.0100809
SEP10_HUMAN	Septin-10	24.8513	24.5857	-0.155036	0.00908458
RL32_HUMAN	60S ribosomal protein L32	27.2707	26.9817	-0.153696	0.00698943
XRN2_HUMAN	5'-3' exoribonuclease 2	27.7592	27.4659	-0.153246	7.85703e-07
TRFE_HUMAN	Serotransferrin	24.5045	24.2457	-0.153165	0.000382225
CTBL1_HUMAN	Beta-catenin-like protein 1	23.5264	23.2784	-0.152904	0.0308677
SUCB1_HUMAN	Succinate--CoA ligase [ADP-forming] subunit beta, mitochondrial	26.0125	25.7396	-0.152185	0.0229871
GNAS1_HUMAN	Guanine nucleotide-binding protein G(s) subunit alpha isoforms XLas	27.5939	27.3055	-0.151592	0.0420718
MEMO1_HUMAN	Protein MEMO1	23.7545	23.5083	-0.150325	0.000593482
SPS2L_HUMAN	SPATS2-like protein	24.4863	24.2345	-0.149128	0.00882823
PARP4_HUMAN	Poly [ADP-ribose] polymerase 4	22.1653	21.9377	-0.148906	0.000136473
DPOD2_HUMAN	DNA polymerase delta subunit 2	23.9453	23.7005	-0.148272	0.00801647
EXOC7_HUMAN	Exocyst complex component 7	22.4148	22.187	-0.147346	0.00264595
RBMX_HUMAN	RNA-binding motif protein, X chromosome	23.7646	23.5233	-0.147226	0.00547305
PAI1_HUMAN	Plasminogen activator inhibitor 1	26.6606	26.3909	-0.14666	0.000170398
HDHD3_HUMAN	Haloacid dehalogenase-like hydrolase domain-containing protein 3	19.7294	19.5299	-0.146628	0.0317343
HMCS1_HUMAN	Hydroxymethylglutaryl-CoA synthase, cytoplasmic	23.7236	23.4842	-0.146319	0.0026313
ARL2_HUMAN	ADP-ribosylation factor-like protein 2	25.9631	25.7016	-0.146005	0.0224645
CBX1_HUMAN	Chromobox protein homolog 1	27.9313	27.6506	-0.145747	0.0326082
LTV1_HUMAN	Protein LTV1 homolog	21.9449	21.7248	-0.145415	0.0122328
DBNL_HUMAN	Drebrin-like protein	27.8202	27.5421	-0.144925	0.00426461
ARBK1_HUMAN	Beta-adrenergic receptor kinase 1	23.3042	23.0716	-0.144721	0.000243293
SCFD1_HUMAN	Sec1 family domain-containing protein 1	25.3021	25.051	-0.143865	0.000324263
MCCA_HUMAN	Methylcrotonoyl-CoA carboxylase subunit alpha, mitochondrial	24.4839	24.2411	-0.143779	0.00719956
RTCA_HUMAN	RNA 3'-terminal phosphate cyclase	24.6922	24.4495	-0.142497	0.00507275
BCAT2_HUMAN	Branched-chain-amino-acid aminotransferase, mitochondrial	26.3206	26.0623	-0.142275	0.00568364
PPIL4_HUMAN	Peptidyl-prolyl cis-trans isomerase-like 4	24.4582	24.2196	-0.141433	0.032794
MAVS_HUMAN	Mitochondrial antiviral-signaling protein	23.5632	23.3335	-0.141322	0.000131261
STA5B_HUMAN	Signal transducer and activator of transcription 5B	23.6944	23.4643	-0.140801	0.000405969
STXB1_HUMAN	Syntaxin-binding protein 1	26.1156	25.8622	-0.140685	0.000216382
PCBP2_HUMAN	Poly(rC)-binding protein 2	30.2748	29.9866	-0.137978	0.000574735
CADM4_HUMAN	Cell adhesion molecule 4	23.7822	23.5559	-0.137926	0.0041352
NSMA2_HUMAN	Sphingomyelin phosphodiesterase 3	22.7057	22.49	-0.13767	0.000870905
HAT1_HUMAN	Histone acetyltransferase type B catalytic subunit	28.2514	27.9832	-0.137593	4.74058e-06
OXR1_HUMAN	Oxidation resistance protein 1	28.3861	28.1217	-0.135003	0.000190755
CTNB1_HUMAN	Catenin beta-1	32.2696	31.9692	-0.134927	1.60853e-08
DCXR_HUMAN	L-xylulose reductase	25.719	25.4802	-0.134577	0.000488357
CYTN_HUMAN	Cystatin-SN	26.8591	26.61	-0.134435	8.16571e-06
ACSF2_HUMAN	Acyl-CoA synthetase family member 2, mitochondrial	25.822	25.5828	-0.134241	0.000908933
RM45_HUMAN	39S ribosomal protein L45, mitochondrial	25.2761	25.043	-0.133661	0.0242762
SC24C_HUMAN	Protein transport protein Sec24C	26.2468	26.005	-0.13352	0.0217342
UN13D_HUMAN	Protein unc-13 homolog D	25.0713	24.8419	-0.132607	0.00371745
KITH_HUMAN	Thymidine kinase, cytosolic	26.1752	25.9359	-0.132463	9.06751e-06
RENR_HUMAN	Renin receptor	19.8709	19.6893	-0.132447	0.0175822
PCNA_HUMAN	Proliferating cell nuclear antigen	30.7332	30.4526	-0.132305	0.0036709
ABCF2_HUMAN	ATP-binding cassette sub-family F member 2	25.8301	25.5948	-0.13201	0.000642744
TXNL1_HUMAN	Thioredoxin-like protein 1	26.157	25.9188	-0.131997	0.0195989
RM39_HUMAN	39S ribosomal protein L39, mitochondrial	25.3471	25.1164	-0.131914	0.000471739
GLP3L_HUMAN	Golgi phosphoprotein 3-like	23.0384	22.8292	-0.131598	0.0123918
GNA13_HUMAN	Guanine nucleotide-binding protein subunit alpha-13	27.1387	26.8929	-0.131263	0.0034637
LYPL1_HUMAN	Lysophospholipase-like protein 1	19.8213	19.6457	-0.128379	0.0371679
LIPA1_HUMAN	Liprin-alpha-1	22.9815	22.7789	-0.127756	0.00438476
AP2B1_HUMAN	AP-2 complex subunit beta	28.6126	28.3621	-0.126852	0.0302318
OFUT1_HUMAN	GDP-fucose protein O-fucosyltransferase 1	25.5563	25.3334	-0.126387	0.0189813
LRC20_HUMAN	Leucine-rich repeat-containing protein 20	20.2032	20.0271	-0.126273	4.67989e-05
LYRIC_HUMAN	Protein LYRIC	24.6687	24.454	-0.126109	0.0205182
RM48_HUMAN	39S ribosomal protein L48, mitochondrial	23.4136	23.2114	-0.125133	0.00198372
PP14B_HUMAN	Protein phosphatase 1 regulatory subunit 14B	24.5572	24.3464	-0.124345	0.0474124
RL8_HUMAN	60S ribosomal protein L8	28.8022	28.5554	-0.124108	0.000118575
GLYC_HUMAN	Serine hydroxymethyltransferase, cytosolic	27.0053	26.7747	-0.123766	3.61056e-05
RS7_HUMAN	40S ribosomal protein S7	29.5138	29.2628	-0.123226	0.0046066
DUT_HUMAN	Deoxyuridine 5'-triphosphate nucleotidohydrolase, mitochondrial	27.5767	27.3437	-0.122393	0.00283499
CDC16_HUMAN	Cell division cycle protein 16 homolog	24.066	23.8629	-0.122259	0.000288211
SETD3_HUMAN	Histone-lysine N-methyltransferase setd3	24.556	24.3497	-0.121667	0.00584347
MK14_HUMAN	Mitogen-activated protein kinase 14	25.2847	25.0747	-0.120314	0.0047823
RT27_HUMAN	28S ribosomal protein S27, mitochondrial	25.0729	24.8689	-0.117889	0.00453822
TMED7_HUMAN	Transmembrane emp24 domain-containing protein 7	26.4198	26.2063	-0.117033	0.00759213
CDK5_HUMAN	Cyclin-dependent-like kinase 5	23.9177	23.7245	-0.117023	0.0327568
RU2A_HUMAN	U2 small nuclear ribonucleoprotein A'	24.8926	24.6921	-0.116677	0.00234558
STING_HUMAN	Stimulator of interferon genes protein	22.3056	22.1261	-0.116598	0.0494294
USP9X_HUMAN	Probable ubiquitin carboxyl-terminal hydrolase FAF-X	22.5467	22.3653	-0.116533	0.034839
COR1C_HUMAN	Coronin-1C	28.4741	28.2454	-0.116332	0.000148381
CLPT1_HUMAN	Cleft lip and palate transmembrane protein 1	23.9308	23.7391	-0.116001	4.38962e-06
PRC2C_HUMAN	Protein PRRC2C	23.8327	23.6445	-0.114401	0.00373014
PDXD1_HUMAN	Pyridoxal-dependent decarboxylase domain-containing protein 1	23.7992	23.612	-0.113926	0.00264672
COPG2_HUMAN	Coatomer subunit gamma-2	27.0836	26.8712	-0.113584	0.00278213
LS14B_HUMAN	Protein LSM14 homolog B	23.7942	23.6085	-0.113037	0.00928219
ACTY_HUMAN	Beta-centractin	27.0201	26.8093	-0.112988	0.00326191
SSDH_HUMAN	Succinate-semialdehyde dehydrogenase, mitochondrial	22.871	22.6929	-0.112743	0.0487926
SRA1_HUMAN	Steroid receptor RNA activator 1	22.807	22.6301	-0.112325	0.0221472
NUB1_HUMAN	NEDD8 ultimate buster 1	22.0851	21.9144	-0.111981	0.00162108
WDR5_HUMAN	WD repeat-containing protein 5	24.6446	24.4557	-0.11099	0.0264308
MCM2_HUMAN	DNA replication licensing factor MCM2	29.4442	29.2208	-0.109872	1.15273e-07
IDHP_HUMAN	Isocitrate dehydrogenase [NADP], mitochondrial	27.8722	27.6639	-0.108239	0.00444085
PLXB2_HUMAN	Plexin-B2	24.2939	24.1128	-0.107932	0.0108079
MCM6_HUMAN	DNA replication licensing factor MCM6	29.1163	28.9036	-0.10577	2.97235e-08
PGP_HUMAN	Glycerol-3-phosphate phosphatase	24.4005	24.2224	-0.105696	0.0218404
BROX_HUMAN	BRO1 domain-containing protein BROX	22.6381	22.473	-0.105634	0.0236896
SEPT2_HUMAN	Septin-2	27.8346	27.6316	-0.105574	0.00538713
DYL2_HUMAN	Dynein light chain 2, cytoplasmic	25.3879	25.2031	-0.105379	0.0128608
3HIDH_HUMAN	3-hydroxyisobutyrate dehydrogenase, mitochondrial	25.0511	24.869	-0.105274	0.0488207
HIBCH_HUMAN	3-hydroxyisobutyryl-CoA hydrolase, mitochondrial	24.94	24.7587	-0.10525	8.96701e-05
VATG1_HUMAN	V-type proton ATPase subunit G 1	22.9211	22.7569	-0.103728	0.0405403
FPRP_HUMAN	Prostaglandin F2 receptor negative regulator	21.7098	21.5549	-0.103303	0.0214173
EIF3D_HUMAN	Eukaryotic translation initiation factor 3 subunit D	27.9413	27.7426	-0.102933	0.000674104
NAKD2_HUMAN	NAD kinase 2, mitochondrial	20.6512	20.5044	-0.102909	4.44908e-05
EDF1_HUMAN	Endothelial differentiation-related factor 1	25.5713	25.3926	-0.10117	0.0130851
MIPEP_HUMAN	Mitochondrial intermediate peptidase	23.4447	23.281	-0.101109	0.0087273
E2AK2_HUMAN	Interferon-induced, double-stranded RNA-activated protein kinase	25.6307	25.453	-0.100371	0.0106583
SH3B4_HUMAN	SH3 domain-binding protein 4	24.3322	24.1642	-0.100001	0.0156952
AT1A1_HUMAN	Sodium/potassium-transporting ATPase subunit alpha-1	29.9727	29.7677	-0.0989912	0.000980473
RS9_HUMAN	40S ribosomal protein S9	29.2642	29.0657	-0.0982334	0.0432657
ARAF_HUMAN	Serine/threonine-protein kinase A-Raf	22.3865	22.2361	-0.0972703	0.0140378
2AAB_HUMAN	Serine/threonine-protein phosphatase 2A 65 kDa regulatory subunit A beta isoform	28.5064	28.3148	-0.0972585	0.0366383
MAP11_HUMAN	Methionine aminopeptidase 1	25.8711	25.6988	-0.0963914	0.0165433
L2GL1_HUMAN	Lethal(2) giant larvae protein homolog 1	24.547	24.384	-0.0961437	0.030033
UMPS_HUMAN	Uridine 5'-monophosphate synthase	27.6452	27.4622	-0.0958422	0.00395651
BGAL_HUMAN	Beta-galactosidase	26.1819	26.0104	-0.0947634	0.00980576
GLGB_HUMAN	1,4-alpha-glucan-branching enzyme	23.1403	22.989	-0.0946487	0.0176967
MOT4_HUMAN	Monocarboxylate transporter 4	20.6806	20.5458	-0.0943312	0.00986579
C2D1A_HUMAN	Coiled-coil and C2 domain-containing protein 1A	22.5783	22.4321	-0.0937112	0.0457877
TCOF_HUMAN	Treacle protein	24.5849	24.4297	-0.0913683	0.000582824
RTCB_HUMAN	tRNA-splicing ligase RtcB homolog	28.1428	27.9653	-0.0912447	0.0258135
NIPS1_HUMAN	Protein NipSnap homolog 1	25.2689	25.1111	-0.0903818	0.0290887
PYC_HUMAN	Pyruvate carboxylase, mitochondrial	26.6002	26.4363	-0.089174	0.00456611
TRI25_HUMAN	E3 ubiquitin/ISG15 ligase TRIM25	26.4123	26.2506	-0.0886247	0.00121262
SYFB_HUMAN	Phenylalanine--tRNA ligase beta subunit	26.5006	26.3402	-0.0875803	0.0054643
AN32E_HUMAN	Acidic leucine-rich nuclear phosphoprotein 32 family member E	26.5162	26.3576	-0.0865613	0.0248599
NEUA_HUMAN	N-acylneuraminate cytidylyltransferase	22.2424	22.1097	-0.0863269	0.000976625
RL10A_HUMAN	60S ribosomal protein L10a	28.6768	28.5074	-0.0855169	0.0070464
GNA11_HUMAN	Guanine nucleotide-binding protein subunit alpha-11	25.9523	25.7998	-0.0849973	0.0222967
ARFG2_HUMAN	ADP-ribosylation factor GTPase-activating protein 2	23.9147	23.7756	-0.0841698	0.00251971
MCM4_HUMAN	DNA replication licensing factor MCM4	29.9799	29.809	-0.082453	0.00288078
RFC2_HUMAN	Replication factor C subunit 2	23.9836	23.8493	-0.0809959	0.00860339
NDUV1_HUMAN	NADH dehydrogenase [ubiquinone] flavoprotein 1, mitochondrial	25.8837	25.7391	-0.0808655	0.00141438
SAAL1_HUMAN	Protein SAAL1	25.4174	25.2758	-0.0806044	0.0331203
SSRG_HUMAN	Translocon-associated protein subunit gamma	24.4077	24.2719	-0.0804833	0.00577478
HSP7E_HUMAN	Heat shock 70 kDa protein 14	24.73	24.5936	-0.079808	0.00848649
STXB2_HUMAN	Syntaxin-binding protein 2	26.1392	25.9955	-0.0795234	0.00760505
STK38_HUMAN	Serine/threonine-protein kinase 38	23.2554	23.1283	-0.0791081	1.45553e-05
DP13B_HUMAN	DCC-interacting protein 13-beta	21.3782	21.2625	-0.0782416	0.00363867
TRAF6_HUMAN	TNF receptor-associated factor 6	25.9005	25.7609	-0.0779811	0.046512
CATA_HUMAN	Catalase	27.0044	26.8603	-0.0771704	0.000118089
DHX30_HUMAN	Putative ATP-dependent RNA helicase DHX30	25.9966	25.8594	-0.0763158	0.0152238
MRT4_HUMAN	mRNA turnover protein 4 homolog	25.3156	25.1832	-0.0756401	0.00135459
UBP2L_HUMAN	Ubiquitin-associated protein 2-like	25.5996	25.4685	-0.0740867	0.00200408
LRBA_HUMAN	Lipopolysaccharide-responsive and beige-like anchor protein	21.4156	21.3066	-0.0736053	0.00182495
KBP_HUMAN	KIF1-binding protein	22.7943	22.6785	-0.0734555	0.00551818
NDUA8_HUMAN	NADH dehydrogenase [ubiquinone] 1 alpha subcomplex subunit 8	25.8352	25.7049	-0.0729464	0.00707317
FIS1_HUMAN	Mitochondrial fission 1 protein	25.2135	25.0882	-0.0718744	0.00752289
CSK22_HUMAN	Casein kinase II subunit alpha'	25.4777	25.353	-0.0707824	0.00404043
PSMD7_HUMAN	26S proteasome non-ATPase regulatory subunit 7	28.5768	28.4379	-0.0702942	6.66903e-05
DNJA1_HUMAN	DnaJ homolog subfamily A member 1	28.3699	28.2325	-0.0700432	0.0208392
THIK_HUMAN	3-ketoacyl-CoA thiolase, peroxisomal	26.5222	26.3965	-0.0685405	0.00326746
H1BP3_HUMAN	HCLS1-binding protein 3	23.473	23.362	-0.0683693	0.0164793
SODC_HUMAN	Superoxide dismutase [Cu-Zn]	31.0821	30.936	-0.0679973	0.0282024
BCAM_HUMAN	Basal cell adhesion molecule	27.1139	26.9874	-0.0674402	0.000305986
ILF3_HUMAN	Interleukin enhancer-binding factor 3	28.4024	28.2705	-0.0671556	0.000236479
SYJ2B_HUMAN	Synaptojanin-2-binding protein	23.8963	23.7853	-0.0671552	0.036946
IF2B3_HUMAN	Insulin-like growth factor 2 mRNA-binding protein 3	27.6022	27.4747	-0.066772	0.0489044
RL21_HUMAN	60S ribosomal protein L21	28.2724	28.1424	-0.06652	0.0255345
MCM5_HUMAN	DNA replication licensing factor MCM5	29.3193	29.1852	-0.0661118	5.15054e-07
FAH2A_HUMAN	Fumarylacetoacetate hydrolase domain-containing protein 2A	25.5674	25.4508	-0.0659438	0.0114501
RS3A_HUMAN	40S ribosomal protein S3a	30.223	30.0853	-0.0658767	0.00481212
NUD16_HUMAN	U8 snoRNA-decapping enzyme	19.5674	19.4784	-0.0657986	0.0366485
FA8_HUMAN	Coagulation factor VIII	29.2154	29.0826	-0.0657249	0.00662536
RT14_HUMAN	28S ribosomal protein S14, mitochondrial	22.9419	22.839	-0.0648216	0.00364501
CLIC1_HUMAN	Chloride intracellular channel protein 1	31.1145	30.9787	-0.0631185	0.0465817
RL9_HUMAN	60S ribosomal protein L9	29.2177	29.0912	-0.0625728	0.0116591
ALG5_HUMAN	Dolichyl-phosphate beta-glucosyltransferase	21.2332	21.1413	-0.0625398	0.000504416
SC23A_HUMAN	Protein transport protein Sec23A	25.6594	25.5498	-0.0617142	0.0248869
NRDC_HUMAN	Nardilysin	24.5668	24.4621	-0.0616553	0.0405585
ITB1_HUMAN	Integrin beta-1	27.5969	27.4807	-0.0608668	0.0156241
ERCC2_HUMAN	TFIIH basal transcription factor complex helicase XPD subunit	21.2993	21.2103	-0.0604175	0.00298798
IQGA2_HUMAN	Ras GTPase-activating-like protein IQGAP2	30.9824	30.8533	-0.0602026	0.000975113
ELAV1_HUMAN	ELAV-like protein 1	25.7644	25.6577	-0.0598723	0.0371968
SEPT8_HUMAN	Septin-8	26.7696	26.6724	-0.0524789	0.0100689
F1142_HUMAN	Protein FAM114A2	22.8796	22.797	-0.052164	0.0215933
CTND1_HUMAN	Catenin delta-1	27.7136	27.6142	-0.0518242	0.000160824
GMPR2_HUMAN	GMP reductase 2	23.3219	23.2386	-0.0516298	0.0110798
IDH3G_HUMAN	Isocitrate dehydrogenase [NAD] subunit gamma, mitochondrial	26.3092	26.2156	-0.0514365	0.00326356
COMD9_HUMAN	COMM domain-containing protein 9	22.894	22.8135	-0.050781	0.0419294
MPI_HUMAN	Mannose-6-phosphate isomerase	24.7873	24.7004	-0.0506348	0.00360371
PCCA_HUMAN	Propionyl-CoA carboxylase alpha chain, mitochondrial	23.4459	23.3641	-0.0504088	0.00216554
RS5_HUMAN	40S ribosomal protein S5	28.5189	28.4216	-0.0492775	0.00844398
SPTB2_HUMAN	Spectrin beta chain, non-erythrocytic 1	28.6863	28.5904	-0.0483025	0.0141834
AN32A_HUMAN	Acidic leucine-rich nuclear phosphoprotein 32 family member A	29.7894	29.6903	-0.0480681	0.00647405
MSH2_HUMAN	DNA mismatch repair protein Msh2	27.5394	27.4496	-0.0470952	0.037242
SYQ_HUMAN	Glutamine--tRNA ligase	28.5518	28.462	-0.0454343	4.48383e-05
SEP11_HUMAN	Septin-11	27.3242	27.2389	-0.0450985	0.0132163
TPD53_HUMAN	Tumor protein D53	26.0609	25.9797	-0.0450594	0.00318835
AL7A1_HUMAN	Alpha-aminoadipic semialdehyde dehydrogenase	28.7824	28.6939	-0.0444125	0.000440924
SCRB2_HUMAN	Lysosome membrane protein 2	25.0217	24.9449	-0.0443714	0.000985092
MAON_HUMAN	NADP-dependent malic enzyme, mitochondrial	21.4176	21.3524	-0.0439272	0.0323211
PPT1_HUMAN	Palmitoyl-protein thioesterase 1	26.3679	26.2894	-0.0429689	0.0305949
UBXN7_HUMAN	UBX domain-containing protein 7	25.1085	25.0339	-0.0428842	0.0382132
AT2A2_HUMAN	Sarcoplasmic/endoplasmic reticulum calcium ATPase 2	27.7483	27.6711	-0.0402167	0.00453836
GSTP1_HUMAN	Glutathione S-transferase P	32.1054	32.0174	-0.039573	0.0249478
PSA_HUMAN	Puromycin-sensitive aminopeptidase	29.3605	29.2825	-0.0383577	0.0335643
ECH1_HUMAN	Delta(3,5)-Delta(2,4)-dienoyl-CoA isomerase, mitochondrial	28.195	28.1211	-0.037887	0.0219153
SYDM_HUMAN	Aspartate--tRNA ligase, mitochondrial	24.6279	24.5641	-0.0373951	0.0275093
NFU1_HUMAN	NFU1 iron-sulfur cluster scaffold homolog, mitochondrial	23.759	23.6981	-0.0370504	0.0438344
TRUB2_HUMAN	Mitochondrial mRNA pseudouridine synthase TRUB2	22.378	22.3228	-0.0355917	0.0424192
NDUF7_HUMAN	Protein arginine methyltransferase NDUFAF7, mitochondrial	23.0081	22.9518	-0.0353703	0.0380648
GYS1_HUMAN	Glycogen [starch] synthase, muscle	26.2016	26.1383	-0.0348993	0.0219083
SYEP_HUMAN	Bifunctional glutamate/proline--tRNA ligase	29.1431	29.0733	-0.0345865	0.00254794
KT3K_HUMAN	Ketosamine-3-kinase	24.8612	24.8027	-0.0339774	0.019131
UBP13_HUMAN	Ubiquitin carboxyl-terminal hydrolase 13	26.8946	26.834	-0.0325174	0.0322942
AATM_HUMAN	Aspartate aminotransferase, mitochondrial	29.6734	29.6078	-0.0319372	0.0142087
PAK4_HUMAN	Serine/threonine-protein kinase PAK 4	24.2999	24.2491	-0.0301464	0.00130402
RECQ1_HUMAN	ATP-dependent DNA helicase Q1	27.726	27.6712	-0.028526	0.00244042
IDHC_HUMAN	Isocitrate dehydrogenase [NADP] cytoplasmic	28.1527	28.0988	-0.0276124	1.22587e-05
TIM50_HUMAN	Mitochondrial import inner membrane translocase subunit TIM50	27.5157	27.4634	-0.0274725	0.00797721
STX17_HUMAN	Syntaxin-17	25.3172	25.27	-0.0269326	0.000510801
RL13_HUMAN	60S ribosomal protein L13	28.4938	28.4422	-0.0261689	0.00219197
ABHEB_HUMAN	Protein ABHD14B	25.8645	25.8207	-0.0244243	0.0322343
KAD1_HUMAN	Adenylate kinase isoenzyme 1	27.3476	27.3018	-0.0241516	0.0409411
PGAM5_HUMAN	Serine/threonine-protein phosphatase PGAM5, mitochondrial	23.6103	23.5726	-0.0230522	0.0402505
SURF4_HUMAN	Surfeit locus protein 4	25.4544	25.418	-0.020657	0.00120025
CTNA2_HUMAN	Catenin alpha-2	27.3392	27.3008	-0.0202414	0.000621639
DCA16_HUMAN	DDB1- and CUL4-associated factor 16	21.8935	21.8633	-0.019926	0.0221048
SYHM_HUMAN	Probable histidine--tRNA ligase, mitochondrial	29.5361	29.4965	-0.0193415	0.00242937
SPTN4_HUMAN	Spectrin beta chain, non-erythrocytic 4	26.3176	26.2881	-0.0161827	0.0302465
PSA2_HUMAN	Proteasome subunit alpha type-2	27.3256	27.2967	-0.0152282	0.028628
CN119_HUMAN	Uncharacterized protein C14orf119	20.3058	20.286	-0.0140516	0.00238791
UBR5_HUMAN	E3 ubiquitin-protein ligase UBR5	20.3058	20.286	-0.0140516	0.00238791
MCM3_HUMAN	DNA replication licensing factor MCM3	29.5608	29.5348	-0.012662	0.00563846
CTNA1_HUMAN	Catenin alpha-1	29.8091	29.7842	-0.0120496	0.00139793
SRBS1_HUMAN	Sorbin and SH3 domain-containing protein 1	21.9789	21.9608	-0.0118677	1.01692e-06
PLBL2_HUMAN	Putative phospholipase B-like 2	21.1872	21.1699	-0.0117858	0.00239706
DJC13_HUMAN	DnaJ homolog subfamily C member 13	24.9001	24.8814	-0.0108408	0.0229455
HNRPK_HUMAN	Heterogeneous nuclear ribonucleoprotein K	31.2203	31.2009	-0.00895676	0.00337982
ACSL4_HUMAN	Long-chain-fatty-acid--CoA ligase 4	28.8566	28.8396	-0.00849175	0.0246991
XRCC5_HUMAN	X-ray repair cross-complementing protein 5	30.6358	30.6179	-0.00842398	0.0227053
CTR1_HUMAN	High affinity cationic amino acid transporter 1	23.8067	23.7931	-0.00824929	0.0162761
WDR44_HUMAN	WD repeat-containing protein 44	24.4921	24.4816	-0.00620499	0.0118887
SF3A2_HUMAN	Splicing factor 3A subunit 2	21.398	21.39	-0.00536693	6.24059e-05
EMAL2_HUMAN	Echinoderm microtubule-associated protein-like 2	26.4859	26.4786	-0.00398519	0.0142394
ARAP1_HUMAN	Arf-GAP with Rho-GAP domain, ANK repeat and PH domain-containing protein 1	24.6357	24.63	-0.00335187	0.00892767
NIPS2_HUMAN	Protein NipSnap homolog 2	24.4029	24.3994	-0.00206796	0.0475684
CASP6_HUMAN	Caspase-6	24.3222	24.3212	-0.000615855	0.0474346
C1QBP_HUMAN	Complement component 1 Q subcomponent-binding protein, mitochondrial	31.0549	31.0538	-0.000477589	0.0408027
DDX5_HUMAN	Probable ATP-dependent RNA helicase DDX5	27.8204	27.8219	0.000746527	0.0129746
PPME1_HUMAN	Protein phosphatase methylesterase 1	32.445	32.4493	0.0019093	0.00169854
ERAP1_HUMAN	Endoplasmic reticulum aminopeptidase 1	24.6064	24.6104	0.00238865	0.00255099
NAGK_HUMAN	N-acetyl-D-glucosamine kinase	26.2198	26.2281	0.00455616	0.00349766
NXF1_HUMAN	Nuclear RNA export factor 1	22.1614	22.1698	0.00546603	0.00401245
GTR1_HUMAN	Solute carrier family 2, facilitated glucose transporter member 1	29.5335	29.5503	0.00820761	0.000536285
LAP2A_HUMAN	Lamina-associated polypeptide 2, isoform alpha	25.3591	25.3762	0.00967552	0.0347948
CCDC9_HUMAN	Coiled-coil domain-containing protein 9	22.6218	22.6374	0.00993122	0.00151888
SPY4_HUMAN	Protein sprouty homolog 4	25.7802	25.7983	0.0101621	0.0193772
ANM5_HUMAN	Protein arginine N-methyltransferase 5	28.2419	28.2642	0.011388	0.000166828
AIFM1_HUMAN	Apoptosis-inducing factor 1, mitochondrial	28.8972	28.9205	0.0116017	0.026906
IMA1_HUMAN	Importin subunit alpha-1	29.2181	29.2453	0.0134291	0.00282896
VAMP3_HUMAN	Vesicle-associated membrane protein 3	26.9111	26.9367	0.0137158	0.00519148
VDAC1_HUMAN	Voltage-dependent anion-selective channel protein 1	30.902	30.9317	0.0138506	0.0118884
TXND5_HUMAN	Thioredoxin domain-containing protein 5	28.7295	28.7596	0.0150875	0.0371725
DREB_HUMAN	Drebrin	24.9275	24.9537	0.0151668	0.000428587
ANFY1_HUMAN	Rabankyrin-5	25.2941	25.321	0.0153273	0.0276886
GCDH_HUMAN	Glutaryl-CoA dehydrogenase, mitochondrial	25.3946	25.4224	0.0157709	0.000141494
CCD93_HUMAN	Coiled-coil domain-containing protein 93	22.1692	22.1945	0.0164397	0.024118
CYH2_HUMAN	Cytohesin-2	23.6429	23.6708	0.0170145	8.12876e-05
PSA6_HUMAN	Proteasome subunit alpha type-6	28.8167	28.8509	0.0170952	0.0356677
COPG1_HUMAN	Coatomer subunit gamma-1	28.45	28.4843	0.0173924	0.0152227
TCPE_HUMAN	T-complex protein 1 subunit epsilon	31.3288	31.3711	0.0194294	0.0100627
LONM_HUMAN	Lon protease homolog, mitochondrial	28.752	28.7914	0.0197376	0.0418502
TBB2B_HUMAN	Tubulin beta-2B chain	33.8638	33.9105	0.0198867	0.0306201
EXOC5_HUMAN	Exocyst complex component 5	21.5786	21.6084	0.0199406	0.0331141
SNAA_HUMAN	Alpha-soluble NSF attachment protein	27.5507	27.589	0.0200454	0.00948393
CACP_HUMAN	Carnitine O-acetyltransferase	22.6694	22.701	0.0201268	0.0238396
SYIM_HUMAN	Isoleucine--tRNA ligase, mitochondrial	27.1696	27.2113	0.0221	0.00780782
TBB3_HUMAN	Tubulin beta-3 chain	33.8207	33.8734	0.0224596	0.00444256
ATRAP_HUMAN	Type-1 angiotensin II receptor-associated protein	23.0793	23.1159	0.0228713	3.13493e-07
PRS6B_HUMAN	26S proteasome regulatory subunit 6B	29.4721	29.5196	0.023273	0.0298403
NSF_HUMAN	Vesicle-fusing ATPase	28.0378	28.084	0.0237462	0.00888417
HNRPR_HUMAN	Heterogeneous nuclear ribonucleoprotein R	29.5187	29.5687	0.0243965	0.0304771
MDHC_HUMAN	Malate dehydrogenase, cytoplasmic	30.0171	30.0684	0.0246505	0.0326774
PHP14_HUMAN	14 kDa phosphohistidine phosphatase	24.3156	24.3585	0.0254242	0.0237384
CTL2_HUMAN	Choline transporter-like protein 2	24.3281	24.3723	0.0261819	0.000924712
CYTS_HUMAN	Cystatin-S	25.0598	25.1083	0.0278998	0.0292752
RNZ2_HUMAN	Zinc phosphodiesterase ELAC protein 2	27.2798	27.3333	0.028245	0.0486781
CD9_HUMAN	CD9 antigen	26.8477	26.9004	0.028292	0.00948154
PPM1G_HUMAN	Protein phosphatase 1G	28.5014	28.559	0.0291031	0.00972584
8ODP_HUMAN	7,8-dihydro-8-oxoguanine triphosphatase	24.8911	24.9421	0.02951	0.0291577
TCPB_HUMAN	T-complex protein 1 subunit beta	31.0609	31.1253	0.0298978	0.00373207
KPCA_HUMAN	Protein kinase C alpha type	23.836	23.886	0.0301836	0.0167814
ARHG2_HUMAN	Rho guanine nucleotide exchange factor 2	24.6684	24.7227	0.0317442	0.0040215
RL12_HUMAN	60S ribosomal protein L12	29.9082	29.975	0.0322176	0.0186373
TBB2A_HUMAN	Tubulin beta-2A chain	33.8034	33.8795	0.0324322	0.0104595
PDP1_HUMAN	[Pyruvate dehydrogenase [acetyl-transferring]]-phosphatase 1, mitochondrial	26.1593	26.2188	0.0328012	0.030379
TBA1B_HUMAN	Tubulin alpha-1B chain	34.9599	35.0402	0.0331031	0.0080955
HACD3_HUMAN	Very-long-chain (3R)-3-hydroxyacyl-CoA dehydratase 3	28.0812	28.1467	0.0335954	0.00243871
EPN1_HUMAN	Epsin-1	21.9719	22.0238	0.0339973	0.00636861
VAMP2_HUMAN	Vesicle-associated membrane protein 2	26.4804	26.5453	0.0352677	0.000356328
PCBP1_HUMAN	Poly(rC)-binding protein 1	30.6362	30.7119	0.0355929	0.0447153
LRC40_HUMAN	Leucine-rich repeat-containing protein 40	23.9524	24.0116	0.0356344	0.0107338
ERO1A_HUMAN	ERO1-like protein alpha	26.2039	26.2698	0.0362558	0.0253355
TBA1A_HUMAN	Tubulin alpha-1A chain	34.9398	35.0285	0.0365713	0.0037717
HM13_HUMAN	Minor histocompatibility antigen H13	24.6741	24.7367	0.0366025	0.0293039
ACTN4_HUMAN	Alpha-actinin-4	33.5297	33.6156	0.0369214	0.0037533
1A02_HUMAN	HLA class I histocompatibility antigen, A-2 alpha chain	28.8712	28.9456	0.0371634	0.0368201
ACTN2_HUMAN	Alpha-actinin-2	31.4922	31.5753	0.0380144	0.000415241
CSN5_HUMAN	COP9 signalosome complex subunit 5	25.6925	25.7608	0.0382874	0.0106963
SCYL1_HUMAN	N-terminal kinase-like protein	25.2758	25.343	0.0383206	0.0323484
COR1B_HUMAN	Coronin-1B	25.8922	25.9613	0.0384468	0.00182287
ARK72_HUMAN	Aflatoxin B1 aldehyde reductase member 2	25.5186	25.587	0.0385905	0.000351242
PSD11_HUMAN	26S proteasome non-ATPase regulatory subunit 11	30.1497	30.2306	0.0386511	0.018701
TRI56_HUMAN	E3 ubiquitin-protein ligase TRIM56	22.458	22.5187	0.0389437	0.032498
PABP4_HUMAN	Polyadenylate-binding protein 4	29.5723	29.6525	0.0390619	0.00388047
RACK1_HUMAN	Receptor of activated protein C kinase 1	30.3726	30.4561	0.0395897	0.0403217
DDX17_HUMAN	Probable ATP-dependent RNA helicase DDX17	27.4353	27.513	0.0407964	0.00421568
TBA1C_HUMAN	Tubulin alpha-1C chain	34.792	34.8909	0.0409474	0.000556006
SCAM3_HUMAN	Secretory carrier-associated membrane protein 3	21.5612	21.6227	0.0411044	0.00196351
FACE1_HUMAN	CAAX prenyl protease 1 homolog	24.3668	24.4377	0.041902	0.000493322
OGA_HUMAN	Protein O-GlcNAcase	25.6213	25.6984	0.0433539	0.000364586
PPIC_HUMAN	Peptidyl-prolyl cis-trans isomerase C	22.6773	22.747	0.0442404	0.00396277
TWF1_HUMAN	Twinfilin-1	27.9528	28.0388	0.0443421	0.00270029
PROF1_HUMAN	Profilin-1	33.0009	33.1041	0.0450247	0.0418561
TRIP6_HUMAN	Thyroid receptor-interacting protein 6	26.6073	26.6949	0.0474244	0.0177876
VDAC3_HUMAN	Voltage-dependent anion-selective channel protein 3	28.6455	28.7401	0.047575	0.000120082
TRMB_HUMAN	tRNA (guanine-N(7)-)-methyltransferase	27.3976	27.4887	0.0478609	0.00674702
HNRPF_HUMAN	Heterogeneous nuclear ribonucleoprotein F	28.9384	29.0348	0.0479402	4.57165e-05
PRPS2_HUMAN	Ribose-phosphate pyrophosphokinase 2	28.6703	28.7667	0.0484313	2.6083e-05
CSK21_HUMAN	Casein kinase II subunit alpha	28.3781	28.4746	0.0489437	9.32843e-05
R39L5_HUMAN	Putative 60S ribosomal protein L39-like 5	22.6627	22.74	0.0491432	0.00953112
NSUN2_HUMAN	tRNA (cytosine(34)-C(5))-methyltransferase	26.5357	26.6263	0.0492134	0.0031181
NUP54_HUMAN	Nucleoporin p54	27.4329	27.5267	0.0492456	0.0153098
AATC_HUMAN	Aspartate aminotransferase, cytoplasmic	27.5558	27.6505	0.0494641	0.0135237
PRS8_HUMAN	26S proteasome regulatory subunit 8	29.9247	30.0277	0.0495337	0.025034
NHRF2_HUMAN	Na(+)/H(+) exchange regulatory cofactor NHE-RF2	22.9879	23.0687	0.0506053	0.00955527
HMGB3_HUMAN	High mobility group protein B3	29.1133	29.2166	0.0511065	0.00122679
ANM1_HUMAN	Protein arginine N-methyltransferase 1	30.9741	31.084	0.0511198	0.000317975
ILKAP_HUMAN	Integrin-linked kinase-associated serine/threonine phosphatase 2C	22.3556	22.4357	0.0516158	0.000579093
SET_HUMAN	Protein SET	30.6248	30.7348	0.0517044	0.0356242
2AAA_HUMAN	Serine/threonine-protein phosphatase 2A 65 kDa regulatory subunit A alpha isoform	30.4376	30.5483	0.0524053	0.0101226
THTM_HUMAN	3-mercaptopyruvate sulfurtransferase	25.3208	25.4132	0.0525515	0.0182052
DYN2_HUMAN	Dynamin-2	26.5907	26.6893	0.0533644	0.0248749
RET1_HUMAN	Retinol-binding protein 1	32.1243	32.2446	0.0539169	0.0405884
OTUB1_HUMAN	Ubiquitin thioesterase OTUB1	28.4877	28.5946	0.0540351	0.0277823
ATPA_HUMAN	ATP synthase subunit alpha, mitochondrial	31.3486	31.4673	0.0545048	0.00486897
CCD51_HUMAN	Coiled-coil domain-containing protein 51	23.3574	23.4459	0.054557	0.00219269
LPPRC_HUMAN	Leucine-rich PPR motif-containing protein, mitochondrial	30.5384	30.6542	0.0546047	0.0149007
DYN1_HUMAN	Dynamin-1	25.8952	25.9938	0.0548214	0.0306845
TBA3C_HUMAN	Tubulin alpha-3C/D chain	34.5358	34.6679	0.0550528	0.000457395
ACADV_HUMAN	Very long-chain specific acyl-CoA dehydrogenase, mitochondrial	29.8439	29.9601	0.0560415	0.0024344
1A24_HUMAN	HLA class I histocompatibility antigen, A-24 alpha chain	26.1793	26.2824	0.0566753	0.0087157
EIF3B_HUMAN	Eukaryotic translation initiation factor 3 subunit B	29.2505	29.366	0.0568315	0.000429422
SCMC1_HUMAN	Calcium-binding mitochondrial carrier protein SCaMC-1	26.3482	26.4522	0.0568501	0.0438003
SPRE_HUMAN	Sepiapterin reductase	26.2671	26.3709	0.0569206	0.00858903
1433E_HUMAN	14-3-3 protein epsilon	32.6384	32.7676	0.0569966	0.00127956
IMB1_HUMAN	Importin subunit beta-1	30.2627	30.3829	0.0571952	0.044959
TCPZ_HUMAN	T-complex protein 1 subunit zeta	30.7478	30.8702	0.0572996	0.000252052
ICLN_HUMAN	Methylosome subunit pICln	28.0845	28.1963	0.0573048	0.0242775
THOP1_HUMAN	Thimet oligopeptidase	26.3586	26.4637	0.0573613	0.00459552
PPP5_HUMAN	Serine/threonine-protein phosphatase 5	27.2957	27.4049	0.0575816	0.00496514
AGM1_HUMAN	Phosphoacetylglucosamine mutase	26.1919	26.2972	0.0579275	0.0280112
CTBP1_HUMAN	C-terminal-binding protein 1	25.0926	25.1944	0.0583801	0.0257351
ZC3HF_HUMAN	Zinc finger CCCH domain-containing protein 15	25.2694	25.3725	0.0587605	0.00886446
DAD1_HUMAN	Dolichyl-diphosphooligosaccharide--protein glycosyltransferase subunit DAD1	22.5	22.593	0.0595214	0.0118987
ACTN1_HUMAN	Alpha-actinin-1	33.7838	33.9238	0.0596431	0.000107452
UBFD1_HUMAN	Ubiquitin domain-containing protein UBFD1	25.6032	25.7097	0.0598783	0.0395066
MDHM_HUMAN	Malate dehydrogenase, mitochondrial	32.1316	32.2663	0.0603295	0.00173218
XPP3_HUMAN	Probable Xaa-Pro aminopeptidase 3	29.7111	29.8364	0.0606882	0.0120323
ACLY_HUMAN	ATP-citrate synthase	30.6207	30.7501	0.0608454	0.000392979
EFTU_HUMAN	Elongation factor Tu, mitochondrial	30.2346	30.3625	0.0608908	0.00347169
TCPH_HUMAN	T-complex protein 1 subunit eta	30.8429	30.9746	0.0614482	0.00112016
COF1_HUMAN	Cofilin-1	32.8047	32.947	0.0624228	0.0423187
CUL1_HUMAN	Cullin-1	26.6763	26.7926	0.0627513	0.00896375
VATH_HUMAN	V-type proton ATPase subunit H	26.2658	26.3825	0.0639548	0.00353368
PSMD8_HUMAN	26S proteasome non-ATPase regulatory subunit 8	27.5733	27.6966	0.0643716	0.000875025
PYGL_HUMAN	Glycogen phosphorylase, liver form	28.6429	28.7715	0.064632	0.00100418
ETFA_HUMAN	Electron transfer flavoprotein subunit alpha, mitochondrial	28.1284	28.2559	0.0652428	0.00358806
AL9A1_HUMAN	4-trimethylaminobutyraldehyde dehydrogenase	27.8935	28.0205	0.0655302	0.0308618
PSMD3_HUMAN	26S proteasome non-ATPase regulatory subunit 3	28.9451	29.0777	0.0659417	0.00189134
SYK_HUMAN	Lysine--tRNA ligase	28.8254	28.9577	0.0660507	0.0111988
TMED9_HUMAN	Transmembrane emp24 domain-containing protein 9	27.5409	27.6676	0.0662326	0.0208586
MYOF_HUMAN	Myoferlin	25.0358	25.1511	0.0662884	0.0098587
FLNA_HUMAN	Filamin-A	33.8435	34.0012	0.0670898	0.000373456
CAV1_HUMAN	Caveolin-1	23.7958	23.9085	0.0681661	6.05619e-06
AASS_HUMAN	Alpha-aminoadipic semialdehyde synthase, mitochondrial	25.9676	26.0907	0.0682611	0.000252095
MYL9_HUMAN	Myosin regulatory light polypeptide 9	28.8963	29.0339	0.06855	0.00503136
TKT_HUMAN	Transketolase	32.5074	32.6626	0.0687065	0.0368769
PGRC1_HUMAN	Membrane-associated progesterone receptor component 1	26.9731	27.1023	0.0689346	0.0173912
CUL2_HUMAN	Cullin-2	23.8146	23.9294	0.0693509	0.0199799
HS74L_HUMAN	Heat shock 70 kDa protein 4L	29.0927	29.2332	0.0695203	0.0414362
COMD2_HUMAN	COMM domain-containing protein 2	21.4091	21.5132	0.0699997	0.00577256
SPT5H_HUMAN	Transcription elongation factor SPT5	26.3529	26.4812	0.0701103	0.00279408
C1TM_HUMAN	Monofunctional C1-tetrahydrofolate synthase, mitochondrial	24.9949	25.1173	0.0704403	9.52444e-05
ELP1_HUMAN	Elongator complex protein 1	24.5338	24.654	0.0705212	3.63378e-05
WDR1_HUMAN	WD repeat-containing protein 1	31.4453	31.5996	0.0706336	0.00338228
TGT_HUMAN	Queuine tRNA-ribosyltransferase catalytic subunit 1	22.7495	22.8612	0.0706687	0.00624566
GSTO1_HUMAN	Glutathione S-transferase omega-1	28.3068	28.4461	0.07082	0.0383882
PGAM1_HUMAN	Phosphoglycerate mutase 1	32.1453	32.3035	0.0708323	0.00219885
GPN1_HUMAN	GPN-loop GTPase 1	24.1376	24.257	0.0711625	0.0465452
TGM2_HUMAN	Protein-glutamine gamma-glutamyltransferase 2	34.4658	34.6395	0.0725241	0.0019915
OPA1_HUMAN	Dynamin-like 120 kDa protein, mitochondrial	27.3651	27.503	0.0725346	0.0314854
TCPA_HUMAN	T-complex protein 1 subunit alpha	30.9529	31.1106	0.0732884	3.49671e-06
ANXA7_HUMAN	Annexin A7	27.2908	27.43	0.0734091	0.00450347
UBAP2_HUMAN	Ubiquitin-associated protein 2	23.5349	23.6556	0.073801	0.0366573
S14L2_HUMAN	SEC14-like protein 2	25.0748	25.2047	0.0745705	0.0147371
PDIA3_HUMAN	Protein disulfide-isomerase A3	31.5674	31.7314	0.0747255	0.0395566
CLIC4_HUMAN	Chloride intracellular channel protein 4	29.4669	29.62	0.074727	0.035783
GLYM_HUMAN	Serine hydroxymethyltransferase, mitochondrial	30.5098	30.6683	0.0747662	0.00148484
TCPG_HUMAN	T-complex protein 1 subunit gamma	31.279	31.4419	0.0749221	4.32344e-05
NCPR_HUMAN	NADPH--cytochrome P450 reductase	26.9076	27.049	0.0755882	0.003835
PPID_HUMAN	Peptidyl-prolyl cis-trans isomerase D	27.5486	27.6936	0.0757438	0.0185279
PSA7_HUMAN	Proteasome subunit alpha type-7	30.044	30.2023	0.0758401	0.00561144
HSPB1_HUMAN	Heat shock protein beta-1	31.6329	31.8007	0.076356	0.000371488
DNJB2_HUMAN	DnaJ homolog subfamily B member 2	24.7748	24.9063	0.0763969	0.044835
SDF2L_HUMAN	Stromal cell-derived factor 2-like protein 1	22.4794	22.5989	0.0765074	0.0161683
NTM1A_HUMAN	N-terminal Xaa-Pro-Lys N-methyltransferase 1	25.3495	25.4856	0.0772492	0.0114699
RM43_HUMAN	39S ribosomal protein L43, mitochondrial	26.5515	26.6957	0.0781457	0.0150786
SYMM_HUMAN	Methionine--tRNA ligase, mitochondrial	30.6328	30.7998	0.0784405	0.000429402
DDI2_HUMAN	Protein DDI1 homolog 2	25.1382	25.2755	0.0786158	0.00325292
PRPS1_HUMAN	Ribose-phosphate pyrophosphokinase 1	28.9589	29.1173	0.0787137	6.40167e-06
DNLI4_HUMAN	DNA ligase 4	24.8931	25.0295	0.0788114	0.013068
PSA1_HUMAN	Proteasome subunit alpha type-1	28.8204	28.9783	0.0788517	0.0257251
U5S1_HUMAN	116 kDa U5 small nuclear ribonucleoprotein component	27.2456	27.3958	0.0793095	9.02806e-06
PDLI5_HUMAN	PDZ and LIM domain protein 5	26.0352	26.1798	0.0798768	0.00335766
TOM40_HUMAN	Mitochondrial import receptor subunit TOM40 homolog	27.2002	27.3521	0.0803761	2.24148e-05
SRSF1_HUMAN	Serine/arginine-rich splicing factor 1	24.0297	24.1648	0.0809035	0.0116612
SDHB_HUMAN	Succinate dehydrogenase [ubiquinone] iron-sulfur subunit, mitochondrial	26.2147	26.3621	0.0809101	0.0197365
RUVB2_HUMAN	RuvB-like 2	30.2463	30.4169	0.0811128	0.00587656
LEG3_HUMAN	Galectin-3	27.3539	27.5099	0.0820473	0.0357544
TBA8_HUMAN	Tubulin alpha-8 chain	33.6205	33.8124	0.0821424	2.27056e-05
RT22_HUMAN	28S ribosomal protein S22, mitochondrial	26.0835	26.2332	0.0825937	0.000842142
GDIB_HUMAN	Rab GDP dissociation inhibitor beta	30.7336	30.9118	0.0834154	0.00946012
FLNC_HUMAN	Filamin-C	28.8658	29.0333	0.0834912	6.52638e-06
HCDH_HUMAN	Hydroxyacyl-coenzyme A dehydrogenase, mitochondrial	26.7848	26.9403	0.0835483	0.0185657
SPEE_HUMAN	Spermidine synthase	27.684	27.8451	0.0836877	0.017799
DBR1_HUMAN	Lariat debranching enzyme	25.0392	25.1854	0.083958	0.0374642
TNPO1_HUMAN	Transportin-1	28.4529	28.6194	0.0841722	0.000948402
PPIA_HUMAN	Peptidyl-prolyl cis-trans isomerase A	33.9987	34.1984	0.084496	0.0307715
SNP23_HUMAN	Synaptosomal-associated protein 23	24.2895	24.4347	0.085965	0.0215528
IQGA1_HUMAN	Ras GTPase-activating-like protein IQGAP1	30.6499	30.8343	0.0865283	0.000141531
AP3B1_HUMAN	AP-3 complex subunit beta-1	26.1747	26.3325	0.086739	0.0058701
DD19A_HUMAN	ATP-dependent RNA helicase DDX19A	26.6525	26.8138	0.0870345	0.0121485
OSGEP_HUMAN	Probable tRNA N6-adenosine threonylcarbamoyltransferase	26.0168	26.1744	0.0871048	0.0383358
MALT1_HUMAN	Mucosa-associated lymphoid tissue lymphoma translocation protein 1	26.7434	26.9054	0.0871161	0.0136277
SC31A_HUMAN	Protein transport protein Sec31A	26.5055	26.6665	0.0873952	0.00100873
RTKN2_HUMAN	Rhotekin-2	22.3023	22.4379	0.0874201	0.037871
HYAS1_HUMAN	Hyaluronan synthase 1	26.0089	26.1673	0.0875476	0.000565163
PGK1_HUMAN	Phosphoglycerate kinase 1	34.0831	34.2908	0.0876537	0.00451098
PRDX6_HUMAN	Peroxiredoxin-6	31.3865	31.5785	0.0879417	0.016544
GSHR_HUMAN	Glutathione reductase, mitochondrial	27.9344	28.1055	0.0880912	0.00379097
EZRI_HUMAN	Ezrin	32.0588	32.2555	0.0882765	1.68067e-05
ITA5_HUMAN	Integrin alpha-5	20.6777	20.8049	0.088536	0.00369371
CY1_HUMAN	Cytochrome c1, heme protein, mitochondrial	27.065	27.2317	0.0885958	0.0116262
ANXA5_HUMAN	Annexin A5	30.2858	30.4726	0.088741	0.00153853
6PGL_HUMAN	6-phosphogluconolactonase	27.6443	27.8149	0.0887448	0.00506287
MTCH1_HUMAN	Mitochondrial carrier homolog 1	26.9638	27.1302	0.0887942	0.00295028
KPRA_HUMAN	Phosphoribosyl pyrophosphate synthase-associated protein 1	25.8447	26.0043	0.0888104	0.00221465
SAHH_HUMAN	Adenosylhomocysteinase	31.2028	31.3962	0.0891037	0.0404675
SCRN1_HUMAN	Secernin-1	27.9832	28.1569	0.0892478	0.00794323
CBR1_HUMAN	Carbonyl reductase [NADPH] 1	29.4831	29.6667	0.0895894	0.0311538
DHPR_HUMAN	Dihydropteridine reductase	26.8577	27.0254	0.0897866	0.00981748
PPIB_HUMAN	Peptidyl-prolyl cis-trans isomerase B	29.0572	29.2393	0.0901395	0.0153619
EF1B_HUMAN	Elongation factor 1-beta	30.6521	30.8451	0.090569	0.00300567
PTCD1_HUMAN	Pentatricopeptide repeat-containing protein 1, mitochondrial	20.6105	20.7404	0.0906762	0.0322788
CD97_HUMAN	CD97 antigen	25.1287	25.2872	0.0907062	0.031692
SUCB2_HUMAN	Succinate--CoA ligase [GDP-forming] subunit beta, mitochondrial	29.9516	30.1408	0.0908295	0.00372726
SYIC_HUMAN	Isoleucine--tRNA ligase, cytoplasmic	30.4339	30.6262	0.0908485	8.95773e-05
RT63_HUMAN	Ribosomal protein 63, mitochondrial	21.5592	21.6955	0.0909285	0.0154906
PYGM_HUMAN	Glycogen phosphorylase, muscle form	27.4285	27.6022	0.0910805	0.00220976
AGFG1_HUMAN	Arf-GAP domain and FG repeat-containing protein 1	23.9664	24.1182	0.0911139	0.00123923
CPSF5_HUMAN	Cleavage and polyadenylation specificity factor subunit 5	25.7467	25.9099	0.0911264	0.0399847
HPRT_HUMAN	Hypoxanthine-guanine phosphoribosyltransferase	30.0361	30.2264	0.0911531	0.00462328
TCPD_HUMAN	T-complex protein 1 subunit delta	30.7396	30.935	0.0914138	2.76756e-05
SMD2_HUMAN	Small nuclear ribonucleoprotein Sm D2	25.9991	26.165	0.0917601	0.00313761
RASN_HUMAN	GTPase NRas	25.587	25.7508	0.09206	0.0048075
C1TC_HUMAN	C-1-tetrahydrofolate synthase, cytoplasmic	30.1323	30.3261	0.0925068	0.00741393
RUVB1_HUMAN	RuvB-like 1	30.2755	30.472	0.0933748	2.46446e-05
VATE1_HUMAN	V-type proton ATPase subunit E 1	26.8952	27.07	0.0934946	0.00291395
UFD1_HUMAN	Ubiquitin recognition factor in ER-associated degradation protein 1	26.3316	26.5028	0.0935104	0.021194
ABCE1_HUMAN	ATP-binding cassette sub-family E member 1	27.8605	28.0427	0.094015	0.00303703
ACTC_HUMAN	Actin, alpha cardiac muscle 1	34.5258	34.7517	0.0940593	0.0052878
RIPK1_HUMAN	Receptor-interacting serine/threonine-protein kinase 1	22.9992	23.15	0.0943119	0.0124438
IDH3A_HUMAN	Isocitrate dehydrogenase [NAD] subunit alpha, mitochondrial	26.8322	27.0083	0.0944055	0.0010308
MOES_HUMAN	Moesin	32.9341	33.1507	0.0945803	0.0011487
ENOA_HUMAN	Alpha-enolase	34.5589	34.7867	0.0947493	0.00352087
FLII_HUMAN	Protein flightless-1 homolog	27.3323	27.5137	0.0954373	0.00973454
PLCB4_HUMAN	1-phosphatidylinositol 4,5-bisphosphate phosphodiesterase beta-4	27.1415	27.3221	0.0957025	0.0160972
RFC4_HUMAN	Replication factor C subunit 4	26.3189	26.4944	0.0958919	0.00188916
LIMS3_HUMAN	LIM and senescent cell antigen-like-containing domain protein 3	25.7656	25.9375	0.0959531	0.048768
SYNC_HUMAN	Asparagine--tRNA ligase, cytoplasmic	27.5005	27.685	0.0964743	0.000956965
WDR4_HUMAN	tRNA (guanine-N(7)-)-methyltransferase non-catalytic subunit WDR4	24.9255	25.0932	0.0967585	0.0011959
TNR16_HUMAN	Tumor necrosis factor receptor superfamily member 16	27.6611	27.8475	0.0968924	0.000552955
PYRG1_HUMAN	CTP synthase 1	27.8118	27.9995	0.0970667	0.00178188
SIAS_HUMAN	Sialic acid synthase	28.8584	29.0535	0.0971773	0.00712272
FTO_HUMAN	Alpha-ketoglutarate-dependent dioxygenase FTO	28.2806	28.4723	0.0974508	0.0499088
I2BPL_HUMAN	Interferon regulatory factor 2-binding protein-like	23.5798	23.7403	0.0978606	0.0397015
TCPQ_HUMAN	T-complex protein 1 subunit theta	31.3672	31.5807	0.0978741	2.6838e-06
KAPCB_HUMAN	cAMP-dependent protein kinase catalytic subunit beta	21.6043	21.7514	0.0978808	0.0403324
LEG1_HUMAN	Galectin-1	30.229	30.4352	0.0980818	0.0121873
ENOB_HUMAN	Beta-enolase	33.1887	33.417	0.0988869	0.00190098
TCTP_HUMAN	Translationally-controlled tumor protein	30.5667	30.777	0.0989029	0.0026334
RPN1_HUMAN	Dolichyl-diphosphooligosaccharide--protein glycosyltransferase subunit 1	30.8181	31.0302	0.0989759	0.0003623
ENPL_HUMAN	Endoplasmin	32.3203	32.5433	0.0992018	0.0010114
DUS12_HUMAN	Dual specificity protein phosphatase 12	21.5343	21.683	0.0992554	0.00807446
LRC57_HUMAN	Leucine-rich repeat-containing protein 57	25.3398	25.5151	0.0994677	0.0448977
TTL_HUMAN	Tubulin--tyrosine ligase	20.0948	20.2341	0.0996017	0.00788608
DFFA_HUMAN	DNA fragmentation factor subunit alpha	26.3433	26.5274	0.100467	0.0472281
CASP3_HUMAN	Caspase-3	25.7293	25.9103	0.101129	0.013434
RCC2_HUMAN	Protein RCC2	27.3038	27.4961	0.101263	0.00536398
G3P_HUMAN	Glyceraldehyde-3-phosphate dehydrogenase	35.2835	35.5328	0.101581	0.000217158
HSP7C_HUMAN	Heat shock cognate 71 kDa protein	34.4385	34.6849	0.102868	0.00415879
K1C18_HUMAN	Keratin, type I cytoskeletal 18	29.3277	29.5383	0.103213	0.0143974
ENOG_HUMAN	Gamma-enolase	32.4801	32.714	0.10352	0.00364053
PFKAM_HUMAN	ATP-dependent 6-phosphofructokinase, muscle type	28.5088	28.715	0.103985	0.00284705
TTL12_HUMAN	Tubulin--tyrosine ligase-like protein 12	26.5044	26.6963	0.104071	0.000448966
OXSR1_HUMAN	Serine/threonine-protein kinase OSR1	26.7304	26.924	0.104124	0.0288495
G6PD_HUMAN	Glucose-6-phosphate 1-dehydrogenase	30.2552	30.4752	0.104535	8.17687e-05
BZW1_HUMAN	Basic leucine zipper and W2 domain-containing protein 1	28.6486	28.8587	0.105396	0.008111
PTRD1_HUMAN	Putative peptidyl-tRNA hydrolase PTRHD1	26.2574	26.4502	0.105536	0.00381562
PPM1H_HUMAN	Protein phosphatase 1H	27.6569	27.8606	0.105832	0.00536252
RL11_HUMAN	60S ribosomal protein L11	28.8405	29.053	0.105901	0.00461237
CC124_HUMAN	Coiled-coil domain-containing protein 124	25.1009	25.2863	0.106184	0.0116932
CNDP2_HUMAN	Cytosolic non-specific dipeptidase	26.8463	27.0447	0.106242	0.00670804
AIP_HUMAN	AH receptor-interacting protein	27.6756	27.8802	0.10628	0.0444646
CGB1_HUMAN	Choriogonadotropin subunit beta variant 1	28.6135	28.8259	0.106695	0.0010321
SYHC_HUMAN	Histidine--tRNA ligase, cytoplasmic	29.2188	29.4363	0.106965	0.0037901
MYO1E_HUMAN	Unconventional myosin-Ie	23.5523	23.7278	0.107103	0.00129799
PON2_HUMAN	Serum paraoxonase/arylesterase 2	25.1401	25.3275	0.107128	0.0228253
E41L2_HUMAN	Band 4.1-like protein 2	27.1715	27.3741	0.107193	0.0246323
SNX12_HUMAN	Sorting nexin-12	27.418	27.6225	0.10721	0.0307297
HSP74_HUMAN	Heat shock 70 kDa protein 4	31.6172	31.8537	0.1075	0.0008819
ECM29_HUMAN	Proteasome-associated protein ECM29 homolog	27.5612	27.7677	0.107706	0.000845479
UBXN4_HUMAN	UBX domain-containing protein 4	24.099	24.2797	0.107749	0.00709544
UCK2_HUMAN	Uridine-cytidine kinase 2	24.7344	24.9199	0.107801	2.88047e-06
KPYM_HUMAN	Pyruvate kinase PKM	34.5766	34.8361	0.107881	0.000101712
NAA15_HUMAN	N-alpha-acetyltransferase 15, NatA auxiliary subunit	27.9744	28.1861	0.108784	0.0268158
GNPI1_HUMAN	Glucosamine-6-phosphate isomerase 1	28.4523	28.6687	0.109302	5.26386e-07
PDIA6_HUMAN	Protein disulfide-isomerase A6	30.8049	31.0397	0.109551	0.000131225
PSME1_HUMAN	Proteasome activator complex subunit 1	27.8623	28.0752	0.109778	0.027843
VAT1_HUMAN	Synaptic vesicle membrane protein VAT-1 homolog	27.5884	27.7994	0.10991	1.74113e-07
WASL_HUMAN	Neural Wiskott-Aldrich syndrome protein	24.2646	24.4514	0.110609	0.00686907
PFKAL_HUMAN	ATP-dependent 6-phosphofructokinase, liver type	28.7339	28.9551	0.110611	0.0103533
ACOC_HUMAN	Cytoplasmic aconitate hydratase	27.7149	27.9295	0.111275	0.000104912
TAGL2_HUMAN	Transgelin-2	30.2153	30.4498	0.111514	0.0272407
CSN6_HUMAN	COP9 signalosome complex subunit 6	27.5037	27.718	0.111935	9.18628e-05
P5CR3_HUMAN	Pyrroline-5-carboxylate reductase 3	23.1146	23.2947	0.111969	0.0105838
ALDOA_HUMAN	Fructose-bisphosphate aldolase A	33.28	33.5401	0.112298	2.27645e-05
PRS4_HUMAN	26S proteasome regulatory subunit 4	29.9783	30.214	0.113	0.0354706
STK10_HUMAN	Serine/threonine-protein kinase 10	22.9405	23.1214	0.113342	0.0189769
DIAP1_HUMAN	Protein diaphanous homolog 1	28.1691	28.3915	0.113434	0.000206386
UBA5_HUMAN	Ubiquitin-like modifier-activating enzyme 5	23.9397	24.1287	0.113458	0.0167544
F118B_HUMAN	Protein FAM118B	21.913	22.0861	0.113529	0.0110444
DNJC2_HUMAN	DnaJ homolog subfamily C member 2	24.9118	25.1092	0.113862	0.0247381
PEBP1_HUMAN	Phosphatidylethanolamine-binding protein 1	30.0444	30.283	0.114122	0.0274474
FA98B_HUMAN	Protein FAM98B	25.0284	25.2278	0.114476	0.0255534
RRP44_HUMAN	Exosome complex exonuclease RRP44	27.5632	27.783	0.114575	0.0127326
AGK_HUMAN	Acylglycerol kinase, mitochondrial	24.5436	24.7394	0.114617	0.00155674
ECI1_HUMAN	Enoyl-CoA delta isomerase 1, mitochondrial	26.6807	26.8936	0.11468	0.00534563
MTAP_HUMAN	S-methyl-5'-thioadenosine phosphorylase	27.666	27.887	0.114804	0.00218515
AAAT_HUMAN	Neutral amino acid transporter B(0)	28.3957	28.6226	0.114818	0.000497606
LRC47_HUMAN	Leucine-rich repeat-containing protein 47	27.6405	27.8627	0.115525	0.00190032
DYH7_HUMAN	Dynein heavy chain 7, axonemal	26.7694	26.9847	0.115575	0.0326836
CPSF6_HUMAN	Cleavage and polyadenylation specificity factor subunit 6	26.7159	26.9309	0.115625	0.00266186
ASCC3_HUMAN	Activating signal cointegrator 1 complex subunit 3	23.0583	23.2439	0.11564	0.0474385
MMAD_HUMAN	Methylmalonic aciduria and homocystinuria type D protein, mitochondrial	20.9364	21.1049	0.115647	4.10676e-06
TNPO2_HUMAN	Transportin-2	26.1035	26.3138	0.115754	0.0363536
GPSM1_HUMAN	G-protein-signaling modulator 1	19.5873	19.7451	0.115758	0.00502389
PUR6_HUMAN	Multifunctional protein ADE2	30.7623	31.0102	0.115804	7.35495e-06
ASNA_HUMAN	ATPase ASNA1	28.7148	28.9465	0.115973	6.49091e-05
SPCS2_HUMAN	Signal peptidase complex subunit 2	24.6818	24.8817	0.11637	0.00553895
OSBP1_HUMAN	Oxysterol-binding protein 1	26.5702	26.7859	0.116617	0.000361609
ARHGC_HUMAN	Rho guanine nucleotide exchange factor 12	31.4335	31.6896	0.117065	0.00456907
DHB4_HUMAN	Peroxisomal multifunctional enzyme type 2	26.646	26.8638	0.117428	0.000337141
SERA_HUMAN	D-3-phosphoglycerate dehydrogenase	28.7238	28.9599	0.118097	0.00021217
CAPZB_HUMAN	F-actin-capping protein subunit beta	28.9498	29.1879	0.118148	0.00811787
RBM12_HUMAN	RNA-binding protein 12	26.5449	26.7633	0.118211	0.000576173
OLA1_HUMAN	Obg-like ATPase 1	29.0229	29.2618	0.118253	0.00259937
SF3B3_HUMAN	Splicing factor 3B subunit 3	27.8719	28.1025	0.118846	0.000682276
QCR2_HUMAN	Cytochrome b-c1 complex subunit 2, mitochondrial	29.3696	29.6129	0.119021	0.00264736
1433B_HUMAN	14-3-3 protein beta/alpha	31.7947	32.0589	0.119402	0.000119454
DLG1_HUMAN	Disks large homolog 1	28.0131	28.2459	0.119412	0.00552223
SERPH_HUMAN	Serpin H1	32.1753	32.4435	0.119759	1.91729e-07
ERF3A_HUMAN	Eukaryotic peptide chain release factor GTP-binding subunit ERF3A	28.2805	28.5163	0.119768	0.000167234
GNS_HUMAN	N-acetylglucosamine-6-sulfatase	26.1234	26.3427	0.120608	0.0159133
CPSF2_HUMAN	Cleavage and polyadenylation specificity factor subunit 2	26.1765	26.3968	0.120903	0.00435544
HSP13_HUMAN	Heat shock 70 kDa protein 13	22.6465	22.8374	0.121145	0.0334845
NUDT5_HUMAN	ADP-sugar pyrophosphatase	28.1144	28.3519	0.121346	0.00410236
1433T_HUMAN	14-3-3 protein theta	31.4766	31.7449	0.122464	0.00168099
BAG5_HUMAN	BAG family molecular chaperone regulator 5	23.9133	24.1172	0.122544	0.00658594
T3HPD_HUMAN	Trans-3-hydroxy-L-proline dehydratase	25.9766	26.1984	0.122693	0.000807951
PRDX1_HUMAN	Peroxiredoxin-1	32.2333	32.5094	0.123024	0.00115737
HNRPQ_HUMAN	Heterogeneous nuclear ribonucleoprotein Q	30.3547	30.6147	0.123041	0.00168174
GMPPB_HUMAN	Mannose-1-phosphate guanyltransferase beta	25.2028	25.4201	0.123819	0.00250978
FKBP4_HUMAN	Peptidyl-prolyl cis-trans isomerase FKBP4	30.5336	30.7969	0.123847	0.000329774
RIR2_HUMAN	Ribonucleoside-diphosphate reductase subunit M2	27.623	27.8624	0.124498	0.000423948
ARHL2_HUMAN	Poly(ADP-ribose) glycohydrolase ARH3	24.8611	25.077	0.124734	0.0495696
HXK2_HUMAN	Hexokinase-2	28.0751	28.32	0.125329	2.33572e-06
PURA2_HUMAN	Adenylosuccinate synthetase isozyme 2	27.0626	27.2991	0.125543	0.00440482
MPP6_HUMAN	MAGUK p55 subfamily member 6	24.3818	24.5957	0.125978	0.00459352
GRP78_HUMAN	78 kDa glucose-regulated protein	32.8289	33.1175	0.126264	0.00208418
DDAH1_HUMAN	N(G),N(G)-dimethylarginine dimethylaminohydrolase 1	27.4691	27.7107	0.126319	0.000704797
ELOC_HUMAN	Elongin-C	27.1514	27.3903	0.126386	0.0337018
RL3_HUMAN	60S ribosomal protein L3	31.1682	31.4429	0.126566	0.0364816
NAA16_HUMAN	N-alpha-acetyltransferase 16, NatA auxiliary subunit	26.2369	26.4702	0.127755	0.0438791
STK26_HUMAN	Serine/threonine-protein kinase 26	26.815	27.0565	0.129349	0.000213758
KAD6_HUMAN	Adenylate kinase isoenzyme 6	21.9446	22.1423	0.12938	0.00992229
PCYOX_HUMAN	Prenylcysteine oxidase 1	27.1279	27.3724	0.129462	0.000665921
STIP1_HUMAN	Stress-induced-phosphoprotein 1	31.1759	31.4576	0.129765	0.0106515
BACH_HUMAN	Cytosolic acyl coenzyme A thioester hydrolase	28.946	29.2079	0.129919	0.000703449
GSH0_HUMAN	Glutamate--cysteine ligase regulatory subunit	26.1107	26.3475	0.130267	0.00179998
PTN12_HUMAN	Tyrosine-protein phosphatase non-receptor type 12	31.0609	31.3434	0.130594	6.04888e-05
LDHA_HUMAN	L-lactate dehydrogenase A chain	32.9723	33.2722	0.130617	1.03582e-05
OSBL3_HUMAN	Oxysterol-binding protein-related protein 3	24.0755	24.295	0.130949	0.0484233
DNPEP_HUMAN	Aspartyl aminopeptidase	27.4667	27.7178	0.131327	3.69935e-05
CAZA2_HUMAN	F-actin-capping protein subunit alpha-2	29.2253	29.4928	0.131436	1.79187e-06
GLU2B_HUMAN	Glucosidase 2 subunit beta	28.9537	29.2187	0.131446	0.011278
IMPA1_HUMAN	Inositol monophosphatase 1	27.7864	28.0411	0.131634	5.79607e-05
1433Z_HUMAN	14-3-3 protein zeta/delta	32.2712	32.5681	0.132147	0.00275012
NDUS3_HUMAN	NADH dehydrogenase [ubiquinone] iron-sulfur protein 3, mitochondrial	26.209	26.4509	0.132518	0.0324917
FKBP5_HUMAN	Peptidyl-prolyl cis-trans isomerase FKBP5	24.9219	25.1528	0.133077	0.00846622
AP3M1_HUMAN	AP-3 complex subunit mu-1	26.5342	26.7806	0.133388	0.00455093
STMN1_HUMAN	Stathmin	30.7714	31.0574	0.133478	0.00183365
NDKB_HUMAN	Nucleoside diphosphate kinase B	31.9017	32.1984	0.133534	0.000445568
HXK1_HUMAN	Hexokinase-1	27.9629	28.2231	0.133612	1.12668e-05
ZH11B_HUMAN	Probable palmitoyltransferase ZDHHC11B	27.8982	28.1582	0.133807	0.0049936
MARE1_HUMAN	Microtubule-associated protein RP/EB family member 1	29.9562	30.2356	0.133959	0.00597374
F10A1_HUMAN	Hsc70-interacting protein	29.866	30.1448	0.134054	0.0195601
FA50A_HUMAN	Protein FAM50A	27.2978	27.553	0.134248	0.0221778
4F2_HUMAN	4F2 cell-surface antigen heavy chain	29.245	29.5185	0.134252	9.31047e-06
NCK1_HUMAN	Cytoplasmic protein NCK1	24.6421	24.8725	0.134311	0.00671798
IPO5_HUMAN	Importin-5	30.8651	31.1541	0.134442	0.00137305
ACTBL_HUMAN	Beta-actin-like protein 2	34.4506	34.7737	0.134648	0.00928194
NUD15_HUMAN	Nucleotide triphosphate diphosphatase NUDT15	22.3744	22.5848	0.135058	0.00200466
BID_HUMAN	BH3-interacting domain death agonist	24.9031	25.1375	0.135163	0.0425719
DC1L1_HUMAN	Cytoplasmic dynein 1 light intermediate chain 1	26.6918	26.9431	0.135204	0.00115917
NDUB3_HUMAN	NADH dehydrogenase [ubiquinone] 1 beta subcomplex subunit 3	22.3924	22.6034	0.135318	0.0406834
ADRM1_HUMAN	Proteasomal ubiquitin receptor ADRM1	26.1822	26.4294	0.135553	0.00120068
PTN11_HUMAN	Tyrosine-protein phosphatase non-receptor type 11	25.3061	25.5455	0.135882	0.00279508
TOIP1_HUMAN	Torsin-1A-interacting protein 1	24.8008	25.0356	0.135919	0.0284574
EHD4_HUMAN	EH domain-containing protein 4	29.3425	29.6202	0.135922	9.01987e-07
GDIA_HUMAN	Rab GDP dissociation inhibitor alpha	30.8008	31.0926	0.136043	0.00367504
PNPH_HUMAN	Purine nucleoside phosphorylase	28.1175	28.3843	0.136261	1.293e-05
FUBP2_HUMAN	Far upstream element-binding protein 2	29.747	30.0309	0.137	0.0394202
RALA_HUMAN	Ras-related protein Ral-A	25.4399	25.6826	0.137012	0.0363841
NUP43_HUMAN	Nucleoporin Nup43	24.0345	24.2647	0.137517	0.00113824
OTU6B_HUMAN	OTU domain-containing protein 6B	23.1387	23.3604	0.137551	0.0166875
IMDH2_HUMAN	Inosine-5'-monophosphate dehydrogenase 2	30.2996	30.5906	0.137866	0.000820116
TOPK_HUMAN	Lymphokine-activated killer T-cell-originated protein kinase	24.9199	25.1592	0.137885	0.0272833
LDHB_HUMAN	L-lactate dehydrogenase B chain	32.1097	32.4191	0.138337	9.29027e-07
MSS4_HUMAN	Guanine nucleotide exchange factor MSS4	25.7598	26.0083	0.138477	8.00272e-07
MYLK_HUMAN	Myosin light chain kinase, smooth muscle	25.322	25.5664	0.138596	6.75841e-05
2ABA_HUMAN	Serine/threonine-protein phosphatase 2A 55 kDa regulatory subunit B alpha isoform	27.1782	27.441	0.13886	0.00131248
THUM1_HUMAN	THUMP domain-containing protein 1	23.555	23.783	0.138971	0.000112297
PGES2_HUMAN	Prostaglandin E synthase 2	24.7215	24.9615	0.139379	0.00967748
IF4G1_HUMAN	Eukaryotic translation initiation factor 4 gamma 1	29.1979	29.4831	0.140215	2.31841e-06
DCTP1_HUMAN	dCTP pyrophosphatase 1	23.7159	23.9484	0.140749	0.000226596
GFPT1_HUMAN	Glutamine--fructose-6-phosphate aminotransferase [isomerizing] 1	27.2563	27.5236	0.140802	0.000282772
TCPW_HUMAN	T-complex protein 1 subunit zeta-2	28.4486	28.7277	0.140843	0.013263
HS90A_HUMAN	Heat shock protein HSP 90-alpha	34.9654	35.3086	0.14093	5.95761e-06
NAMPT_HUMAN	Nicotinamide phosphoribosyltransferase	29.4594	29.7487	0.140972	0.000394762
EF2_HUMAN	Elongation factor 2	32.9875	33.3121	0.14127	4.8557e-07
COF2_HUMAN	Cofilin-2	30.8228	31.1276	0.141957	0.00460849
ARMX3_HUMAN	Armadillo repeat-containing X-linked protein 3	25.1241	25.3731	0.142268	0.00048602
FA83D_HUMAN	Protein FAM83D	22.2871	22.5081	0.142351	0.0154725
TBCA_HUMAN	Tubulin-specific chaperone A	28.0342	28.3127	0.142626	0.0305399
HS90B_HUMAN	Heat shock protein HSP 90-beta	34.8518	35.1982	0.142672	3.96857e-05
ANXA2_HUMAN	Annexin A2	34.6615	35.0059	0.142675	0.0022258
SSRP1_HUMAN	FACT complex subunit SSRP1	25.6664	25.9219	0.142873	0.0167591
GARS_HUMAN	Glycine--tRNA ligase	29.6782	29.9738	0.142975	0.000187252
NDRG1_HUMAN	Protein NDRG1	28.3566	28.6396	0.143268	0.000181434
IPYR_HUMAN	Inorganic pyrophosphatase	29.0754	29.3659	0.143424	0.000717795
OGFR_HUMAN	Opioid growth factor receptor	24.2495	24.4922	0.143708	0.0468771
CPNE3_HUMAN	Copine-3	26.6481	26.915	0.143759	0.0103902
PDIA1_HUMAN	Protein disulfide-isomerase	31.3871	31.702	0.144038	0.00101167
IF5A2_HUMAN	Eukaryotic translation initiation factor 5A-2	30.4649	30.7708	0.144126	0.0458558
CNPY4_HUMAN	Protein canopy homolog 4	22.8667	23.0966	0.144312	0.0100197
YTHD1_HUMAN	YTH domain-containing family protein 1	23.6677	23.9058	0.144413	0.00751093
MYG1_HUMAN	UPF0160 protein MYG1, mitochondrial	27.7668	28.0464	0.14454	0.00142897
ADK_HUMAN	Adenosine kinase	25.5938	25.8515	0.144572	0.00159228
JIP4_HUMAN	C-Jun-amino-terminal kinase-interacting protein 4	25.5144	25.7714	0.144576	0.000191727
AHSA1_HUMAN	Activator of 90 kDa heat shock protein ATPase homolog 1	29.2373	29.5324	0.144847	3.00674e-07
AXIN2_HUMAN	Axin-2	25.0468	25.2997	0.144956	0.0038777
CH60_HUMAN	60 kDa heat shock protein, mitochondrial	34.0817	34.4263	0.145168	0.000402472
PRDX2_HUMAN	Peroxiredoxin-2	30.3133	30.6217	0.14603	0.00632804
TXLNA_HUMAN	Alpha-taxilin	24.5724	24.8224	0.146074	0.00317977
COMT_HUMAN	Catechol O-methyltransferase	27.2366	27.5143	0.146332	0.00358366
UBC12_HUMAN	NEDD8-conjugating enzyme Ubc12	27.921	28.2061	0.146542	0.00105093
VAPA_HUMAN	Vesicle-associated membrane protein-associated protein A	29.198	29.4963	0.146673	0.000481363
NPL4_HUMAN	Nuclear protein localization protein 4 homolog	26.535	26.8063	0.146753	0.000347354
CAZA1_HUMAN	F-actin-capping protein subunit alpha-1	29.533	29.8359	0.147217	0.00081649
CCD58_HUMAN	Coiled-coil domain-containing protein 58	25.5265	25.7889	0.147549	0.00293786
CDC23_HUMAN	Cell division cycle protein 23 homolog	26.5356	26.8091	0.147954	5.11269e-05
EHD1_HUMAN	EH domain-containing protein 1	29.3567	29.6594	0.14802	5.64183e-08
PTN1_HUMAN	Tyrosine-protein phosphatase non-receptor type 1	29.0157	29.315	0.148066	1.06968e-07
1433F_HUMAN	14-3-3 protein eta	31.1302	31.4524	0.148579	0.000187181
ACSL1_HUMAN	Long-chain-fatty-acid--CoA ligase 1	25.0276	25.2869	0.148693	0.000537605
GDIR1_HUMAN	Rho GDP-dissociation inhibitor 1	29.9525	30.2628	0.148698	1.62095e-05
PAR6B_HUMAN	Partitioning defective 6 homolog beta	24.8806	25.1396	0.149377	0.0161716
DRG1_HUMAN	Developmentally-regulated GTP-binding protein 1	26.3562	26.6309	0.149601	0.00252735
LSM4_HUMAN	U6 snRNA-associated Sm-like protein LSm4	24.6015	24.8588	0.150058	0.0354533
TMX3_HUMAN	Protein disulfide-isomerase TMX3	22.2192	22.4518	0.150227	0.0027
PUM2_HUMAN	Pumilio homolog 2	21.0511	21.2717	0.150426	0.000163696
NUDC1_HUMAN	NudC domain-containing protein 1	26.3134	26.5894	0.150561	1.17965e-09
CH10_HUMAN	10 kDa heat shock protein, mitochondrial	30.7553	31.0787	0.150903	0.00780442
HSP72_HUMAN	Heat shock-related 70 kDa protein 2	32.7759	33.1209	0.151071	0.00100011
S10A4_HUMAN	Protein S100-A4	29.4974	29.808	0.151124	0.012975
1433S_HUMAN	14-3-3 protein sigma	31.0571	31.3847	0.151392	0.000391363
EF1A2_HUMAN	Elongation factor 1-alpha 2	32.6161	32.9615	0.151981	2.91172e-10
CANB1_HUMAN	Calcineurin subunit B type 1	23.3332	23.5805	0.152086	0.0395068
AHNK_HUMAN	Neuroblast differentiation-associated protein AHNAK	32.9293	33.2796	0.15263	0.000253064
STK24_HUMAN	Serine/threonine-protein kinase 24	27.24	27.5304	0.152962	0.000783252
DNJC9_HUMAN	DnaJ homolog subfamily C member 9	27.6978	27.9946	0.153755	0.00767654
PUS7_HUMAN	Pseudouridylate synthase 7 homolog	26.2226	26.5049	0.154514	0.00321318
CALM1_HUMAN	Calmodulin-1	30.8535	31.1858	0.154581	0.0459105
PLST_HUMAN	Plastin-3	28.8243	29.1352	0.154788	3.88958e-05
P4HA1_HUMAN	Prolyl 4-hydroxylase subunit alpha-1	25.2947	25.5676	0.154836	0.0305837
UBE2H_HUMAN	Ubiquitin-conjugating enzyme E2 H	22.7811	23.0271	0.154958	0.0250774
1C17_HUMAN	HLA class I histocompatibility antigen, Cw-17 alpha chain	23.5455	23.8002	0.155222	0.0395461
RPR1B_HUMAN	Regulation of nuclear pre-mRNA domain-containing protein 1B	26.8598	27.1508	0.155435	0.0273387
NDKA_HUMAN	Nucleoside diphosphate kinase A	31.5831	31.9254	0.155497	0.00024773
DNJC7_HUMAN	DnaJ homolog subfamily C member 7	27.027	27.3201	0.155615	0.0257057
TPM1_HUMAN	Tropomyosin alpha-1 chain	28.4039	28.7127	0.156025	0.0229391
TSNAX_HUMAN	Translin-associated protein X	24.6473	24.9159	0.156383	0.000803256
EMAL6_HUMAN	Echinoderm microtubule-associated protein-like 6	28.5334	28.8448	0.156612	0.00487198
SP16H_HUMAN	FACT complex subunit SPT16	24.71	24.9812	0.157513	0.0151435
CYBP_HUMAN	Calcyclin-binding protein	29.7783	30.1061	0.157966	0.000684869
RM27_HUMAN	39S ribosomal protein L27, mitochondrial	25.7256	26.0092	0.158133	0.0414675
1433G_HUMAN	14-3-3 protein gamma	31.6547	32.0038	0.158215	2.35272e-05
GIPC1_HUMAN	PDZ domain-containing protein GIPC1	25.4815	25.7626	0.158268	0.000811579
LSM2_HUMAN	U6 snRNA-associated Sm-like protein LSm2	27.2282	27.529	0.158489	4.96741e-05
SHLB1_HUMAN	Endophilin-B1	24.5082	24.7807	0.159565	0.00066409
ARMC6_HUMAN	Armadillo repeat-containing protein 6	28.7229	29.0428	0.159795	0.000815565
SH3G1_HUMAN	Endophilin-A2	26.8778	27.1775	0.160004	0.00997727
CPPED_HUMAN	Serine/threonine-protein phosphatase CPPED1	26.7009	26.9996	0.160501	5.09211e-05
CHP1_HUMAN	Calcineurin B homologous protein 1	24.4693	24.7433	0.160643	0.000553882
PFKAP_HUMAN	ATP-dependent 6-phosphofructokinase, platelet type	28.9031	29.2269	0.160719	1.28908e-05
AIMP1_HUMAN	Aminoacyl tRNA synthase complex-interacting multifunctional protein 1	27.5274	27.8378	0.161724	0.0321687
HDGF_HUMAN	Hepatoma-derived growth factor	27.3575	27.6661	0.161861	0.032514
CISY_HUMAN	Citrate synthase, mitochondrial	28.9276	29.2541	0.16193	0.00273748
PRDX4_HUMAN	Peroxiredoxin-4	29.3347	29.667	0.162483	1.49003e-05
2A5E_HUMAN	Serine/threonine-protein phosphatase 2A 56 kDa regulatory subunit epsilon isoform	28.9816	29.31	0.162542	0.00279364
PYGB_HUMAN	Glycogen phosphorylase, brain form	29.1601	29.4915	0.163059	1.19665e-07
CUL4A_HUMAN	Cullin-4A	26.5446	26.847	0.163376	0.000875441
TPD52_HUMAN	Tumor protein D52	26.8721	27.1781	0.163377	0.0134783
KS6A1_HUMAN	Ribosomal protein S6 kinase alpha-1	24.9964	25.2814	0.163569	0.00695201
GNA1_HUMAN	Glucosamine 6-phosphate N-acetyltransferase	25.7979	26.0923	0.163688	0.0184693
RBM39_HUMAN	RNA-binding protein 39	24.8987	25.1834	0.16403	0.000814911
LOXL4_HUMAN	Lysyl oxidase homolog 4	26.0961	26.3946	0.164118	0.00186012
PFD6_HUMAN	Prefoldin subunit 6	27.4719	27.7865	0.16426	0.00491637
EPS15_HUMAN	Epidermal growth factor receptor substrate 15	22.0564	22.3103	0.165161	0.00014526
PUR9_HUMAN	Bifunctional purine biosynthesis protein PURH	31.0219	31.3797	0.165467	0.000561984
GRP75_HUMAN	Stress-70 protein, mitochondrial	31.2212	31.5815	0.165548	0.000181753
UGDH_HUMAN	UDP-glucose 6-dehydrogenase	28.707	29.0388	0.165811	4.10778e-05
NDUA2_HUMAN	NADH dehydrogenase [ubiquinone] 1 alpha subcomplex subunit 2	24.4866	24.7705	0.166306	0.0426973
STAM1_HUMAN	Signal transducing adapter molecule 1	23.8247	24.1009	0.166313	0.0200489
UBA6_HUMAN	Ubiquitin-like modifier-activating enzyme 6	30.9293	31.2883	0.166519	0.000368801
TX1B3_HUMAN	Tax1-binding protein 3	26.7234	27.0337	0.166573	0.0230685
HAP28_HUMAN	28 kDa heat- and acid-stable phosphoprotein	28.2367	28.5661	0.167352	0.0169751
EI2BG_HUMAN	Translation initiation factor eIF-2B subunit gamma	24.3784	24.6632	0.167541	0.0278073
EXOS7_HUMAN	Exosome complex component RRP42	23.8579	24.1374	0.168056	0.00195865
EI2BD_HUMAN	Translation initiation factor eIF-2B subunit delta	27.9257	28.2542	0.168713	3.60929e-05
TRAP1_HUMAN	Heat shock protein 75 kDa, mitochondrial	32.3133	32.6939	0.168943	3.5667e-05
SBDS_HUMAN	Ribosome maturation protein SBDS	28.2246	28.5572	0.169	0.0109608
JUPI1_HUMAN	Jupiter microtubule associated homolog 1	26.7222	27.0382	0.169592	0.00506482
GCC2_HUMAN	GRIP and coiled-coil domain-containing protein 2	25.4297	25.731	0.169955	0.0170782
SERC_HUMAN	Phosphoserine aminotransferase	28.8743	29.2169	0.170195	1.56261e-08
BIN1_HUMAN	Myc box-dependent-interacting protein 1	24.2169	24.5048	0.170485	0.0351418
NHRF1_HUMAN	Na(+)/H(+) exchange regulatory cofactor NHE-RF1	27.6755	28.0063	0.171425	0.0242795
STX6_HUMAN	Syntaxin-6	25.7829	26.0912	0.171506	4.36487e-05
TPM3_HUMAN	Tropomyosin alpha-3 chain	28.68	29.0259	0.17291	0.0229905
PLSI_HUMAN	Plastin-1	27.789	28.1253	0.173576	2.82687e-07
ALDOC_HUMAN	Fructose-bisphosphate aldolase C	31.6443	32.0283	0.174024	0.00017858
TOM70_HUMAN	Mitochondrial import receptor subunit TOM70	26.2305	26.55	0.174637	0.00430695
IF4E_HUMAN	Eukaryotic translation initiation factor 4E	25.6023	25.9145	0.17484	7.34754e-05
SF3A3_HUMAN	Splicing factor 3A subunit 3	23.3289	23.6141	0.175279	0.0301654
HS105_HUMAN	Heat shock protein 105 kDa	31.3345	31.7182	0.175605	4.50258e-09
SFXN3_HUMAN	Sideroflexin-3	24.7695	25.0731	0.175776	0.000492062
KS6A3_HUMAN	Ribosomal protein S6 kinase alpha-3	27.403	27.739	0.175793	0.000717167
SYAC_HUMAN	Alanine--tRNA ligase, cytoplasmic	28.7076	29.0598	0.17592	0.000185887
DEST_HUMAN	Destrin	27.4446	27.7819	0.176257	0.0417955
CUL4B_HUMAN	Cullin-4B	27.1225	27.4561	0.176342	0.00075395
SODM_HUMAN	Superoxide dismutase [Mn], mitochondrial	24.3177	24.6169	0.176434	0.0143198
MESD_HUMAN	LRP chaperone MESD	25.5601	25.8758	0.177061	0.0351033
K1C14_HUMAN	Keratin, type I cytoskeletal 14	24.3874	24.6886	0.177073	0.00995248
MANF_HUMAN	Mesencephalic astrocyte-derived neurotrophic factor	26.839	27.1709	0.177299	0.0127355
SF3B6_HUMAN	Splicing factor 3B subunit 6	23.2624	23.5522	0.17862	0.00113351
MYO15_HUMAN	Unconventional myosin-XV	29.1035	29.4665	0.178868	0.000265503
IF5_HUMAN	Eukaryotic translation initiation factor 5	28.3378	28.6914	0.178929	4.65033e-05
KCRB_HUMAN	Creatine kinase B-type	30.3002	30.6796	0.179496	1.76036e-05
S10A3_HUMAN	Protein S100-A3	24.3416	24.6479	0.180384	0.00750311
RAN_HUMAN	GTP-binding nuclear protein Ran	30.461	30.847	0.181676	1.12872e-08
TM109_HUMAN	Transmembrane protein 109	24.8193	25.1341	0.181848	0.0441636
CIP2A_HUMAN	Protein CIP2A	24.2566	24.5645	0.181926	0.00443557
DHX16_HUMAN	Putative pre-mRNA-splicing factor ATP-dependent RNA helicase DHX16	24.05	24.3557	0.182237	6.55057e-06
JMJD6_HUMAN	Bifunctional arginine demethylase and lysyl-hydroxylase JMJD6	24.6229	24.936	0.182249	0.0365756
WFKN1_HUMAN	WAP, Kazal, immunoglobulin, Kunitz and NTR domain-containing protein 1	27.2928	27.6398	0.18228	3.93722e-05
PDC6I_HUMAN	Programmed cell death 6-interacting protein	29.3167	29.6895	0.182343	0.00157173
HSP76_HUMAN	Heat shock 70 kDa protein 6	31.5827	31.9862	0.183164	2.1415e-05
OSBP2_HUMAN	Oxysterol-binding protein 2	23.7146	24.0178	0.183325	0.000301176
REEP5_HUMAN	Receptor expression-enhancing protein 5	24.4596	24.7726	0.183444	0.000599338
EXOC8_HUMAN	Exocyst complex component 8	18.3792	18.6146	0.183609	0.0391768
UBE2O_HUMAN	(E3-independent) E2 ubiquitin-conjugating enzyme	27.9574	28.3164	0.184099	5.30364e-05
BLVRB_HUMAN	Flavin reductase (NADPH)	26.0457	26.3804	0.184183	0.0484741
BCAR1_HUMAN	Breast cancer anti-estrogen resistance protein 1	24.1588	24.4696	0.184413	4.91164e-05
COG6_HUMAN	Conserved oligomeric Golgi complex subunit 6	23.3186	23.6191	0.184693	0.011486
LAMP2_HUMAN	Lysosome-associated membrane glycoprotein 2	26.7636	27.1088	0.184879	0.000275249
LASP1_HUMAN	LIM and SH3 domain protein 1	29.1615	29.5376	0.184888	0.00385886
APMAP_HUMAN	Adipocyte plasma membrane-associated protein	27.732	28.09	0.185026	0.0002352
SYYC_HUMAN	Tyrosine--tRNA ligase, cytoplasmic	28.2008	28.5671	0.186191	9.8554e-07
CSRP1_HUMAN	Cysteine and glycine-rich protein 1	26.3113	26.6532	0.186258	0.000760537
WDR12_HUMAN	Ribosome biogenesis protein WDR12	23.8774	24.1886	0.186806	5.11951e-08
PACN2_HUMAN	Protein kinase C and casein kinase substrate in neurons protein 2	27.174	27.5288	0.187131	0.00169171
K1C16_HUMAN	Keratin, type I cytoskeletal 16	24.2989	24.6162	0.187168	0.00746574
PODXL_HUMAN	Podocalyxin	24.4685	24.7881	0.187237	0.00499979
6PGD_HUMAN	6-phosphogluconate dehydrogenase, decarboxylating	29.6219	30.0096	0.187608	0.000713883
HMGB2_HUMAN	High mobility group protein B2	29.2149	29.5973	0.187627	0.0327604
MEP50_HUMAN	Methylosome protein 50	27.1488	27.5046	0.187874	0.00171955
DESP_HUMAN	Desmoplakin	26.5116	26.8599	0.188322	0.0177066
RTN4_HUMAN	Reticulon-4	26.0914	26.4343	0.188371	0.0161522
EXOS9_HUMAN	Exosome complex component RRP45	23.3308	23.6385	0.189042	0.000260248
NMD3_HUMAN	60S ribosomal export protein NMD3	25.6522	25.9909	0.189236	0.000175749
IF1AX_HUMAN	Eukaryotic translation initiation factor 1A, X-chromosomal	26.0776	26.4224	0.189515	0.00629566
SF3A1_HUMAN	Splicing factor 3A subunit 1	19.2069	19.4617	0.190086	0.000236658
RCN1_HUMAN	Reticulocalbin-1	29.4611	29.8523	0.190299	0.00142076
KANK2_HUMAN	KN motif and ankyrin repeat domain-containing protein 2	24.2389	24.5634	0.191822	4.01949e-05
YTHD3_HUMAN	YTH domain-containing family protein 3	23.7953	24.1149	0.192443	0.00607605
LC7L2_HUMAN	Putative RNA-binding protein Luc7-like 2	25.3469	25.6883	0.193018	0.0219974
HS71L_HUMAN	Heat shock 70 kDa protein 1-like	32.0922	32.525	0.193254	1.16867e-05
LRRF1_HUMAN	Leucine-rich repeat flightless-interacting protein 1	25.662	26.0084	0.193447	0.0355006
PRRC1_HUMAN	Protein PRRC1	25.5053	25.8506	0.194003	0.00052716
RLA2_HUMAN	60S acidic ribosomal protein P2	30.873	31.2911	0.194048	0.00125388
CRKL_HUMAN	Crk-like protein	27.0429	27.4092	0.194092	0.00254517
ZN207_HUMAN	BUB3-interacting and GLEBS motif-containing protein ZNF207	24.5613	24.8943	0.194292	0.000852486
SNX4_HUMAN	Sorting nexin-4	22.798	23.1072	0.194347	0.000308456
L2HDH_HUMAN	L-2-hydroxyglutarate dehydrogenase, mitochondrial	22.5225	22.8285	0.194698	0.00616802
KAD4_HUMAN	Adenylate kinase 4, mitochondrial	25.3736	25.7187	0.19488	2.27393e-06
CD44_HUMAN	CD44 antigen	27.0679	27.4361	0.194937	2.20314e-11
RFA2_HUMAN	Replication protein A 32 kDa subunit	26.2189	26.5757	0.195025	0.000714027
SIR1_HUMAN	NAD-dependent protein deacetylase sirtuin-1	30.3651	30.7784	0.195078	0.0129001
PFD5_HUMAN	Prefoldin subunit 5	27.651	28.0284	0.195608	0.00970691
DRG2_HUMAN	Developmentally-regulated GTP-binding protein 2	25.2332	25.5782	0.195895	2.81887e-05
IF5A1_HUMAN	Eukaryotic translation initiation factor 5A-1	31.1963	31.6238	0.196359	0.000900193
SNUT2_HUMAN	U4/U6.U5 tri-snRNP-associated protein 2	26.6088	26.9734	0.196379	6.08533e-06
K1C17_HUMAN	Keratin, type I cytoskeletal 17	24.2985	24.6325	0.196943	0.00796067
UAP1L_HUMAN	UDP-N-acetylhexosamine pyrophosphorylase-like protein 1	23.8108	24.14	0.19806	5.46573e-05
TMOD3_HUMAN	Tropomodulin-3	26.8204	27.1927	0.198915	0.00403516
EI2BB_HUMAN	Translation initiation factor eIF-2B subunit beta	24.264	24.6011	0.199055	0.000196358
PGRC2_HUMAN	Membrane-associated progesterone receptor component 2	24.5836	24.9254	0.19922	0.0249935
PTH2_HUMAN	Peptidyl-tRNA hydrolase 2, mitochondrial	24.5685	24.9104	0.199401	0.0101229
CBR3_HUMAN	Carbonyl reductase [NADPH] 3	28.3674	28.7622	0.199408	0.0217719
IMA7_HUMAN	Importin subunit alpha-7	26.6665	27.0393	0.200264	3.26254e-08
GLSK_HUMAN	Glutaminase kidney isoform, mitochondrial	27.052	27.4302	0.200315	0.000413581
K1C19_HUMAN	Keratin, type I cytoskeletal 19	26.4736	26.8442	0.200609	1.40143e-05
PSME2_HUMAN	Proteasome activator complex subunit 2	28.2885	28.6857	0.201143	0.00829478
NED4L_HUMAN	E3 ubiquitin-protein ligase NEDD4-like	22.0305	22.3402	0.201388	0.012526
CHRD1_HUMAN	Cysteine and histidine-rich domain-containing protein 1	28.8167	29.2219	0.201414	3.648e-09
THOC5_HUMAN	THO complex subunit 5 homolog	28.0027	28.3967	0.201575	0.00143987
EFHD2_HUMAN	EF-hand domain-containing protein D2	28.3927	28.7938	0.202378	0.00402571
LIMC1_HUMAN	LIM and calponin homology domains-containing protein 1	23.3429	23.6732	0.202746	0.00063419
TXND9_HUMAN	Thioredoxin domain-containing protein 9	23.9161	24.2569	0.204158	0.0456868
SC24D_HUMAN	Protein transport protein Sec24D	20.6427	20.9372	0.20438	0.0460707
EFNB1_HUMAN	Ephrin-B1	25.2781	25.6396	0.204857	4.94128e-08
AAKB1_HUMAN	5'-AMP-activated protein kinase subunit beta-1	21.532	21.8406	0.205271	0.0198705
PK1L2_HUMAN	Polycystic kidney disease protein 1-like 2	27.2157	27.6069	0.205895	2.15344e-05
UPP1_HUMAN	Uridine phosphorylase 1	23.8078	24.1505	0.206198	9.58056e-06
IDH3B_HUMAN	Isocitrate dehydrogenase [NAD] subunit beta, mitochondrial	26.6955	27.081	0.206831	0.000548164
IF2A_HUMAN	Eukaryotic translation initiation factor 2 subunit 1	28.3429	28.7522	0.20684	9.8597e-05
AIF1L_HUMAN	Allograft inflammatory factor 1-like	24.4484	24.8019	0.207082	0.0382072
CBL_HUMAN	E3 ubiquitin-protein ligase CBL	23.8661	24.2113	0.207155	0.000998227
IGBP1_HUMAN	Immunoglobulin-binding protein 1	26.0918	26.4693	0.207193	0.000945355
PUR1_HUMAN	Amidophosphoribosyltransferase	26.5219	26.906	0.207392	0.000273847
GAB3_HUMAN	GRB2-associated-binding protein 3	23.7326	24.0764	0.207503	5.12638e-07
RNH2B_HUMAN	Ribonuclease H2 subunit B	29.0899	29.5114	0.207535	7.33739e-05
TPD54_HUMAN	Tumor protein D54	29.7861	30.2207	0.208965	0.00110904
UBQL1_HUMAN	Ubiquilin-1	28.0144	28.4236	0.209237	0.00081077
BYST_HUMAN	Bystin	24.3381	24.6949	0.209972	0.00155685
APOB_HUMAN	Apolipoprotein B-100	25.3392	25.7121	0.210761	0.000960605
ARFP2_HUMAN	Arfaptin-2	22.5166	22.849	0.211437	0.000880581
FRIH_HUMAN	Ferritin heavy chain	27.3967	27.8035	0.212671	0.014134
MAT2B_HUMAN	Methionine adenosyltransferase 2 subunit beta	26.7869	27.1863	0.213536	0.0254523
1C04_HUMAN	HLA class I histocompatibility antigen, Cw-4 alpha chain	24.5921	24.9596	0.213994	3.39694e-05
SYSC_HUMAN	Serine--tRNA ligase, cytoplasmic	28.3508	28.7753	0.214406	2.1417e-07
FKBP2_HUMAN	Peptidyl-prolyl cis-trans isomerase FKBP2	26.1937	26.5872	0.215124	0.0127711
PIGS_HUMAN	GPI transamidase component PIG-S	22.788	23.131	0.215535	0.00213236
TATD1_HUMAN	Putative deoxyribonuclease TATDN1	21.2657	21.5877	0.216867	0.0444139
IF4G3_HUMAN	Eukaryotic translation initiation factor 4 gamma 3	26.9546	27.3635	0.217239	0.00129071
MYDGF_HUMAN	Myeloid-derived growth factor	25.5354	25.9233	0.217485	0.00554571
FUBP3_HUMAN	Far upstream element-binding protein 3	26.4214	26.8231	0.217667	0.000913411
GGCT_HUMAN	Gamma-glutamylcyclotransferase	24.9937	25.3739	0.217805	0.00468427
RHG01_HUMAN	Rho GTPase-activating protein 1	30.252	30.7141	0.2187	0.000677104
RABX5_HUMAN	Rab5 GDP/GTP exchange factor	22.3476	22.6908	0.21986	0.0112825
OAT_HUMAN	Ornithine aminotransferase, mitochondrial	28.0136	28.4466	0.221283	2.1445e-06
RAB10_HUMAN	Ras-related protein Rab-10	23.0822	23.4392	0.221399	9.63376e-05
DCLK1_HUMAN	Serine/threonine-protein kinase DCLK1	26.2633	26.6707	0.222093	3.66869e-09
NFKB1_HUMAN	Nuclear factor NF-kappa-B p105 subunit	24.4796	24.8606	0.222808	0.00303385
EPHA2_HUMAN	Ephrin type-A receptor 2	26.4369	26.8492	0.223278	3.76995e-05
FABPH_HUMAN	Fatty acid-binding protein, heart	26.1166	26.5241	0.223371	0.0048836
H90B4_HUMAN	Putative heat shock protein HSP 90-beta 4	31.8848	32.3825	0.223446	0.0219681
PRR31_HUMAN	Proline-rich protein 31	24.519	24.9026	0.223936	2.0559e-05
SF3B1_HUMAN	Splicing factor 3B subunit 1	25.626	26.0298	0.225581	0.00192786
STK3_HUMAN	Serine/threonine-protein kinase 3	24.5791	24.967	0.225892	0.00480641
PQBP1_HUMAN	Polyglutamine-binding protein 1	22.448	22.8038	0.226877	0.0106917
GEPH_HUMAN	Gephyrin	23.6385	24.0143	0.227526	8.65491e-05
KAD3_HUMAN	GTP:AMP phosphotransferase AK3, mitochondrial	25.8669	26.2788	0.227959	0.0161125
PBDC1_HUMAN	Protein PBDC1	27.4395	27.8769	0.228149	1.1403e-05
ANXA3_HUMAN	Annexin A3	29.3611	29.8305	0.228817	5.19e-05
1C01_HUMAN	HLA class I histocompatibility antigen, Cw-1 alpha chain	24.5381	24.9304	0.228831	0.000860857
CNPY3_HUMAN	Protein canopy homolog 3	24.3291	24.72	0.229978	0.0176045
LANC2_HUMAN	LanC-like protein 2	25.0157	25.4178	0.230033	0.00584914
TRAF2_HUMAN	TNF receptor-associated factor 2	21.4266	21.7714	0.230304	2.5626e-05
BICD2_HUMAN	Protein bicaudal D homolog 2	24.0349	24.4225	0.230777	0.000415988
GTR3_HUMAN	Solute carrier family 2, facilitated glucose transporter member 3	29.3542	29.8305	0.232237	0.000428699
TRNT1_HUMAN	CCA tRNA nucleotidyltransferase 1, mitochondrial	24.9209	25.3254	0.232252	0.000292984
JUPI2_HUMAN	Jupiter microtubule associated homolog 2	26.0249	26.4473	0.232277	0.0258446
HNRH3_HUMAN	Heterogeneous nuclear ribonucleoprotein H3	22.7956	23.1663	0.232738	0.0335321
VPS50_HUMAN	Syndetin	23.884	24.2739	0.233656	0.0417151
DNPH1_HUMAN	2'-deoxynucleoside 5'-phosphate N-hydrolase 1	24.6355	25.0381	0.233851	0.000770007
METK2_HUMAN	S-adenosylmethionine synthase isoform type-2	28.3299	28.7939	0.234398	2.5108e-05
DYH1_HUMAN	Dynein heavy chain 1, axonemal	30.6113	31.1141	0.235038	0.000211313
SWAHB_HUMAN	Ankyrin repeat domain-containing protein SOWAHB	26.2231	26.6541	0.235198	0.000391692
PAAF1_HUMAN	Proteasomal ATPase-associated factor 1	28.9546	29.4306	0.235267	0.00331119
YLPM1_HUMAN	YLP motif-containing protein 1	27.0645	27.5101	0.235588	0.0137236
T2EA_HUMAN	General transcription factor IIE subunit 1	20.8694	21.2133	0.235767	0.0123046
CISD1_HUMAN	CDGSH iron-sulfur domain-containing protein 1	23.4418	23.8294	0.236598	0.000156131
SNX18_HUMAN	Sorting nexin-18	22.591	22.9647	0.236673	9.75564e-06
PLXD1_HUMAN	Plexin-D1	25.1836	25.6003	0.236748	0.0121381
TFG_HUMAN	Protein TFG	25.4263	25.8501	0.238508	0.000555352
SGTA_HUMAN	Small glutamine-rich tetratricopeptide repeat-containing protein alpha	26.8336	27.2816	0.238909	0.00680977
HS71A_HUMAN	Heat shock 70 kDa protein 1A	32.2226	32.7619	0.239459	1.77177e-07
COA3_HUMAN	Cytochrome c oxidase assembly factor 3 homolog, mitochondrial	24.2948	24.7057	0.241973	0.00483395
CCDC6_HUMAN	Coiled-coil domain-containing protein 6	24.4637	24.8802	0.243527	0.000358447
STK4_HUMAN	Serine/threonine-protein kinase 4	25.0155	25.4414	0.243557	0.0108943
DNJB1_HUMAN	DnaJ homolog subfamily B member 1	28.2752	28.7577	0.244112	0.000622564
LIMA1_HUMAN	LIM domain and actin-binding protein 1	24.333	24.7487	0.244344	2.76853e-08
DUS3_HUMAN	Dual specificity protein phosphatase 3	25.6339	26.0722	0.24461	6.78798e-07
RHG05_HUMAN	Rho GTPase-activating protein 5	24.5389	24.9607	0.245881	0.00486925
KIFC3_HUMAN	Kinesin-like protein KIFC3	22.4188	22.8048	0.246306	8.12077e-07
NUDC_HUMAN	Nuclear migration protein nudC	28.624	29.117	0.246386	0.00315705
PPIH_HUMAN	Peptidyl-prolyl cis-trans isomerase H	22.0481	22.4281	0.246514	0.00136876
DYH5_HUMAN	Dynein heavy chain 5, axonemal	22.9557	23.3528	0.247447	0.00283511
MIA2_HUMAN	Melanoma inhibitory activity protein 2	20.7169	21.0759	0.24786	0.00368697
S35F2_HUMAN	Solute carrier family 35 member F2	20.7169	21.0759	0.24786	0.00368697
FUBP1_HUMAN	Far upstream element-binding protein 1	28.638	29.1356	0.248524	3.97814e-05
CCD12_HUMAN	Coiled-coil domain-containing protein 12	23.0217	23.4223	0.248914	0.000204842
LCA5_HUMAN	Lebercilin	25.0584	25.4949	0.249112	0.00421273
CDD_HUMAN	Cytidine deaminase	20.0285	20.3777	0.249412	0.0370154
PEA15_HUMAN	Astrocytic phosphoprotein PEA-15	27.4332	27.9169	0.25213	0.000614861
FADD_HUMAN	FAS-associated death domain protein	24.5622	24.9952	0.252146	0.000209522
RUFY1_HUMAN	RUN and FYVE domain-containing protein 1	26.4983	26.9661	0.252495	0.000215783
NDUS2_HUMAN	NADH dehydrogenase [ubiquinone] iron-sulfur protein 2, mitochondrial	26.5322	27.0026	0.25352	0.000129777
LYPA2_HUMAN	Acyl-protein thioesterase 2	26.1414	26.605	0.25359	0.00661129
CMYA5_HUMAN	Cardiomyopathy-associated protein 5	24.1778	24.6073	0.253987	0.0304441
GALD1_HUMAN	Glutamine amidotransferase-like class 1 domain-containing protein 1	22.0512	22.4436	0.254461	0.0157567
MAP1S_HUMAN	Microtubule-associated protein 1S	24.8509	25.2932	0.254473	0.046922
DNJC3_HUMAN	DnaJ homolog subfamily C member 3	26.2692	26.7377	0.255059	0.00522302
DAB2_HUMAN	Disabled homolog 2	25.8449	26.3068	0.255588	0.00310888
RNBP6_HUMAN	Ran-binding protein 6	26.6652	27.1421	0.255758	2.42883e-12
SHC1_HUMAN	SHC-transforming protein 1	22.8941	23.3036	0.255791	0.0437372
TIM44_HUMAN	Mitochondrial import inner membrane translocase subunit TIM44	26.2302	26.7005	0.256365	0.000208221
TRUA_HUMAN	tRNA pseudouridine synthase A	22.0991	22.4955	0.256511	0.00416423
VATB2_HUMAN	V-type proton ATPase subunit B, brain isoform	28.8502	29.3683	0.256773	0.0251602
SLK_HUMAN	STE20-like serine/threonine-protein kinase	24.7122	25.1569	0.257282	0.0355033
PDCD5_HUMAN	Programmed cell death protein 5	27.3044	27.7965	0.257696	0.0170425
GUAD_HUMAN	Guanine deaminase	23.2777	23.6977	0.258003	0.00133301
PPIF_HUMAN	Peptidyl-prolyl cis-trans isomerase F, mitochondrial	24.986	25.4371	0.258171	8.01931e-05
PAPS2_HUMAN	Bifunctional 3'-phosphoadenosine 5'-phosphosulfate synthase 2	22.3502	22.7547	0.258742	0.0198962
LZTL1_HUMAN	Leucine zipper transcription factor-like protein 1	24.4969	24.9405	0.258942	0.00140601
NAA50_HUMAN	N-alpha-acetyltransferase 50	25.3645	25.8239	0.258982	2.36911e-10
KNTC1_HUMAN	Kinetochore-associated protein 1	24.0544	24.4905	0.259213	0.00326929
GLNA_HUMAN	Glutamine synthetase	23.7403	24.1756	0.262163	3.2656e-05
S10AD_HUMAN	Protein S100-A13	26.2139	26.6948	0.262249	0.00451574
VAV2_HUMAN	Guanine nucleotide exchange factor VAV2	23.9603	24.4	0.262342	0.0159066
SC24A_HUMAN	Protein transport protein Sec24A	23.5197	23.953	0.263376	0.00276173
CLCA_HUMAN	Clathrin light chain A	26.2515	26.7361	0.263888	0.000152263
KIF11_HUMAN	Kinesin-like protein KIF11	24.2235	24.672	0.264636	0.0112344
SSA27_HUMAN	Sjoegren syndrome/scleroderma autoantigen 1	26.7906	27.287	0.26484	1.42264e-06
PLPHP_HUMAN	Pyridoxal phosphate homeostasis protein	27.9862	28.5075	0.266252	0.0435917
VAPB_HUMAN	Vesicle-associated membrane protein-associated protein B/C	24.4331	24.8941	0.269687	0.0177575
PFD4_HUMAN	Prefoldin subunit 4	27.1191	27.6316	0.270091	0.000142308
EPDR1_HUMAN	Mammalian ependymin-related protein 1	23.9766	24.4298	0.270124	0.0175843
PHLB1_HUMAN	Pleckstrin homology-like domain family B member 1	25.7058	26.1938	0.271314	0.00258633
ATG5_HUMAN	Autophagy protein 5	17.7937	18.1316	0.271395	0.0117552
KPCD_HUMAN	Protein kinase C delta type	24.2086	24.6691	0.27183	0.000182562
ITPK1_HUMAN	Inositol-tetrakisphosphate 1-kinase	21.7344	22.1506	0.273605	0.0249964
PAWR_HUMAN	PRKC apoptosis WT1 regulator protein	24.6715	25.1455	0.274546	4.31148e-05
CLPB_HUMAN	Caseinolytic peptidase B protein homolog	23.1866	23.634	0.27577	0.0116015
PFD1_HUMAN	Prefoldin subunit 1	26.3651	26.8774	0.277675	0.000105984
CCD43_HUMAN	Coiled-coil domain-containing protein 43	22.9466	23.393	0.277958	0.0354924
GSH1_HUMAN	Glutamate--cysteine ligase catalytic subunit	23.1562	23.6072	0.278305	1.05988e-05
EHD3_HUMAN	EH domain-containing protein 3	28.5788	29.137	0.279044	2.27449e-06
SPRC_HUMAN	SPARC	23.4862	23.9452	0.279256	0.00663985
EIF1_HUMAN	Eukaryotic translation initiation factor 1	26.3192	26.8362	0.280663	7.91798e-05
UBE2S_HUMAN	Ubiquitin-conjugating enzyme E2 S	25.3553	25.8544	0.281244	2.53696e-06
TIGAR_HUMAN	Fructose-2,6-bisphosphatase TIGAR	27.091	27.6248	0.2815	0.000403391
NR2CA_HUMAN	Nuclear receptor 2C2-associated protein	21.6926	22.1215	0.282451	8.73471e-05
PKP2_HUMAN	Plakophilin-2	26.0733	26.5904	0.283335	2.55525e-06
ITB2_HUMAN	Integrin beta-2	23.1676	23.6281	0.283904	8.25411e-05
PDE12_HUMAN	2',5'-phosphodiesterase 12	26.7912	27.3243	0.284209	1.01873e-09
SEC63_HUMAN	Translocation protein SEC63 homolog	22.1809	22.6227	0.284516	0.0457745
NXN_HUMAN	Nucleoredoxin	23.8084	24.2889	0.288215	0.0286604
STXB6_HUMAN	Syntaxin-binding protein 6	22.9746	23.4387	0.288503	0.00182917
PPM1F_HUMAN	Protein phosphatase 1F	24.2501	24.7426	0.290043	0.00645089
LUC7L_HUMAN	Putative RNA-binding protein Luc7-like 1	24.0315	24.5199	0.290274	2.13928e-05
SPF45_HUMAN	Splicing factor 45	24.2796	24.7745	0.29111	0.00175965
CIP4_HUMAN	Cdc42-interacting protein 4	24.165	24.6605	0.29281	0.000967437
ASNS_HUMAN	Asparagine synthetase [glutamine-hydrolyzing]	27.136	27.6934	0.293343	1.52554e-07
DCTN3_HUMAN	Dynactin subunit 3	24.535	25.0408	0.294429	0.029468
ATAD1_HUMAN	ATPase family AAA domain-containing protein 1	22.2511	22.7099	0.294489	0.0485778
LSM8_HUMAN	U6 snRNA-associated Sm-like protein LSm8	23.4511	23.9419	0.298866	0.0273317
PP1R7_HUMAN	Protein phosphatase 1 regulatory subunit 7	25.7786	26.3195	0.299602	3.7243e-05
ATRIP_HUMAN	ATR-interacting protein	23.7486	24.2482	0.300308	0.0252628
MAP2_HUMAN	Methionine aminopeptidase 2	25.4201	25.9576	0.301879	4.88621e-05
TMED1_HUMAN	Transmembrane emp24 domain-containing protein 1	23.3458	23.8404	0.302444	0.00720415
RPB1_HUMAN	DNA-directed RNA polymerase II subunit RPB1	20.4548	20.8903	0.303943	0.00141018
GRPE1_HUMAN	GrpE protein homolog 1, mitochondrial	26.9702	27.5488	0.306208	0.000333849
ZN622_HUMAN	Zinc finger protein 622	23.7549	24.2647	0.306385	0.0480225
CTNS_HUMAN	Cystinosin	27.3596	27.9471	0.306475	1.0596e-06
MAGIX_HUMAN	PDZ domain-containing protein MAGIX	22.4704	22.9539	0.307159	4.42348e-07
ASSY_HUMAN	Argininosuccinate synthase	24.8807	25.4184	0.308477	9.56378e-08
TRM6_HUMAN	tRNA (adenine(58)-N(1))-methyltransferase non-catalytic subunit TRM6	26.7268	27.3047	0.30861	7.4353e-05
CHMP7_HUMAN	Charged multivesicular body protein 7	21.3513	21.8137	0.309062	0.00681892
CLCB_HUMAN	Clathrin light chain B	25.6135	26.1683	0.309146	0.0414477
DCP1A_HUMAN	mRNA-decapping enzyme 1A	21.4009	21.8647	0.309306	0.0010914
MARK2_HUMAN	Serine/threonine-protein kinase MARK2	23.4859	23.9999	0.312333	0.0406722
DCTD_HUMAN	Deoxycytidylate deaminase	24.0174	24.5538	0.318639	0.00672187
5NTC_HUMAN	Cytosolic purine 5'-nucleotidase	26.6437	27.2541	0.326798	0.000227498
MTDC_HUMAN	Bifunctional methylenetetrahydrofolate dehydrogenase/cyclohydrolase, mitochondrial	25.9029	26.5	0.328788	8.91145e-09
PLEC_HUMAN	Plectin	27.5429	28.1804	0.330154	9.5316e-07
AGAL_HUMAN	Alpha-galactosidase A	25.2491	25.8343	0.330537	4.45454e-07
STX7_HUMAN	Syntaxin-7	23.9705	24.5262	0.330605	1.969e-05
NNRD_HUMAN	ATP-dependent (S)-NAD(P)H-hydrate dehydratase	25.9935	26.5978	0.331591	0.0105476
DPY30_HUMAN	Protein dpy-30 homolog	23.6271	24.1789	0.333105	0.0171038
UBQL2_HUMAN	Ubiquilin-2	25.3855	25.9796	0.33375	0.0147683
LAMB2_HUMAN	Laminin subunit beta-2	23.6599	24.2166	0.335506	0.0323142
EGFR_HUMAN	Epidermal growth factor receptor	25.9389	26.5553	0.338847	1.98264e-10
RM10_HUMAN	39S ribosomal protein L10, mitochondrial	22.1212	22.6489	0.340083	0.0262262
SHLB2_HUMAN	Endophilin-B2	27.2572	27.9109	0.341888	9.52625e-08
PFD2_HUMAN	Prefoldin subunit 2	27.4229	28.0845	0.343931	0.000337758
SNX9_HUMAN	Sorting nexin-9	22.099	22.6359	0.346309	0.00223421
WASF1_HUMAN	Wiskott-Aldrich syndrome protein family member 1	24.6252	25.228	0.348862	0.00560793
CBWD1_HUMAN	COBW domain-containing protein 1	28.1569	28.8472	0.349459	0.0411631
NANP_HUMAN	N-acylneuraminate-9-phosphatase	19.6479	20.1336	0.352307	0.0131335
MP2K3_HUMAN	Dual specificity mitogen-activated protein kinase kinase 3	22.3313	22.886	0.353951	0.000670945
YRDC_HUMAN	YrdC domain-containing protein, mitochondrial	22.199	22.7523	0.355225	9.42693e-06
SWP70_HUMAN	Switch-associated protein 70	26.1439	26.7959	0.355407	0.0408628
CUL3_HUMAN	Cullin-3	28.5822	29.2952	0.355466	0.000496346
UB2Q1_HUMAN	Ubiquitin-conjugating enzyme E2 Q1	21.6969	22.24	0.356702	3.69996e-05
DOHH_HUMAN	Deoxyhypusine hydroxylase	24.8925	25.5186	0.358347	1.68011e-05
UAP1_HUMAN	UDP-N-acetylhexosamine pyrophosphorylase	22.7756	23.3546	0.362179	4.39224e-07
GTPB3_HUMAN	tRNA modification GTPase GTPBP3, mitochondrial	21.2744	21.8163	0.362899	0.00134659
BAG3_HUMAN	BAG family molecular chaperone regulator 3	23.6483	24.2522	0.363767	0.00490741
LSG1_HUMAN	Large subunit GTPase 1 homolog	23.6038	24.2067	0.363845	2.06997e-05
CNTRL_HUMAN	Centriolin	23.7789	24.3889	0.365386	0.00158653
ADCYA_HUMAN	Adenylate cyclase type 10	21.7749	22.3367	0.367501	0.000102334
CCNA2_HUMAN	Cyclin-A2	21.3344	21.8868	0.36883	7.60757e-05
PP6R1_HUMAN	Serine/threonine-protein phosphatase 6 regulatory subunit 1	22.3517	22.9319	0.369728	8.90482e-07
MOFA1_HUMAN	MORF4 family-associated protein 1	21.5384	22.0979	0.36999	4.10215e-05
SC24B_HUMAN	Protein transport protein Sec24B	22.5598	23.1558	0.376186	0.00526672
SSU72_HUMAN	RNA polymerase II subunit A C-terminal domain phosphatase SSU72	21.7079	22.2836	0.377637	0.0110377
RPAB3_HUMAN	DNA-directed RNA polymerases I, II, and III subunit RPABC3	23.0179	23.6318	0.37977	0.00196879
4EBP1_HUMAN	Eukaryotic translation initiation factor 4E-binding protein 1	24.7276	25.3884	0.380481	0.00476144
TF65_HUMAN	Transcription factor p65	23.1936	23.8169	0.382601	0.00706588
5NT3A_HUMAN	Cytosolic 5'-nucleotidase 3A	22.2861	22.8912	0.386523	0.00160202
TCAL1_HUMAN	Transcription elongation factor A protein-like 1	22.5092	23.1213	0.38705	0.00117608
FRIL_HUMAN	Ferritin light chain	27.5018	28.2534	0.388992	6.41641e-10
NCEH1_HUMAN	Neutral cholesterol ester hydrolase 1	22.9099	23.5364	0.389222	0.000667526
UB2G1_HUMAN	Ubiquitin-conjugating enzyme E2 G1	19.7422	20.2896	0.394569	0.0366354
FBX2_HUMAN	F-box only protein 2	20.8078	21.3855	0.395053	0.0157918
HEXI1_HUMAN	Protein HEXIM1	24.2081	24.8828	0.396583	0.00112983
GNL1_HUMAN	Guanine nucleotide-binding protein-like 1	24.6642	25.3598	0.401265	0.0025317
FBRL_HUMAN	rRNA 2'-O-methyltransferase fibrillarin	22.9141	23.5617	0.402122	1.57842e-06
RNF25_HUMAN	E3 ubiquitin-protein ligase RNF25	27.3003	28.0739	0.403096	4.19282e-08
TRIM4_HUMAN	E3 ubiquitin-protein ligase TRIM4	20.9592	21.5541	0.403798	0.00732383
SPF30_HUMAN	Survival of motor neuron-related-splicing factor 30	21.6924	22.309	0.404354	0.00178689
NFAC2_HUMAN	Nuclear factor of activated T-cells, cytoplasmic 2	20.1477	20.7247	0.407349	1.59256e-05
RAB2A_HUMAN	Ras-related protein Rab-2A	19.1206	19.6687	0.407679	0.00716619
TRXR1_HUMAN	Thioredoxin reductase 1, cytoplasmic	27.146	27.9327	0.412139	6.44184e-10
P4K2A_HUMAN	Phosphatidylinositol 4-kinase type 2-alpha	21.7407	22.372	0.412995	1.69265e-05
DHTK1_HUMAN	Probable 2-oxoglutarate dehydrogenase E1 component DHKTD1, mitochondrial	22.9523	23.619	0.41307	4.8153e-05
DKC1_HUMAN	H/ACA ribonucleoprotein complex subunit 4	22.7459	23.4087	0.41433	9.51133e-09
NSD3_HUMAN	Histone-lysine N-methyltransferase NSD3	29.0769	29.9272	0.415844	0.0159849
LAMA1_HUMAN	Laminin subunit alpha-1	23.0372	23.7145	0.418007	0.0111577
NUFP2_HUMAN	Nuclear fragile X mental retardation-interacting protein 2	23.6395	24.3367	0.419366	1.69943e-05
AKA12_HUMAN	A-kinase anchor protein 12	23.9112	24.6316	0.428226	5.50326e-07
OBSL1_HUMAN	Obscurin-like protein 1	21.9535	22.6182	0.430286	0.0314459
UBP19_HUMAN	Ubiquitin carboxyl-terminal hydrolase 19	20.4648	21.0878	0.432678	0.0140847
CUL5_HUMAN	Cullin-5	27.5906	28.4349	0.434871	0.0407516
SMYD3_HUMAN	Histone-lysine N-methyltransferase SMYD3	25.7886	26.5801	0.436153	0.0426854
SERB_HUMAN	Phosphoserine phosphatase	25.6394	26.4288	0.437518	5.4481e-06
BCL10_HUMAN	B-cell lymphoma/leukemia 10	22.7112	23.4171	0.441595	0.000789514
IFNW1_HUMAN	Interferon omega-1	25.3856	26.1826	0.445973	4.31144e-05
TSP1_HUMAN	Thrombospondin-1	20.191	20.8264	0.447029	0.0115573
IFRD1_HUMAN	Interferon-related developmental regulator 1	21.1383	21.8048	0.447847	5.95882e-05
PDCL3_HUMAN	Phosducin-like protein 3	22.2745	22.9805	0.450182	0.000331092
UB2R1_HUMAN	Ubiquitin-conjugating enzyme E2 R1	19.2775	19.8886	0.450299	0.0306736
MCES_HUMAN	mRNA cap guanine-N7 methyltransferase	22.7253	23.447	0.451006	0.0347166
PDLI4_HUMAN	PDZ and LIM domain protein 4	19.8313	20.4614	0.451281	9.87537e-05
SGMR2_HUMAN	Sigma intracellular receptor 2	21.6372	22.3327	0.456443	0.000170807
KI20B_HUMAN	Kinesin-like protein KIF20B	25.3427	26.161	0.458458	0.0257846
ANO1_HUMAN	Anoctamin-1	17.8245	18.4028	0.460631	0.00605542
PORIM_HUMAN	Porimin	23.8429	24.6174	0.461146	3.46165e-05
BCAR3_HUMAN	Breast cancer anti-estrogen resistance protein 3	20.8671	21.5585	0.470323	0.0148281
MROH6_HUMAN	Maestro heat-like repeat-containing protein family member 6	21.8194	22.5435	0.471007	0.00313105
YKT6_HUMAN	Synaptobrevin homolog YKT6	18.8886	19.517	0.47216	0.00370899
ALG13_HUMAN	Putative bifunctional UDP-N-acetylglucosamine transferase and deubiquitinase ALG13	22.8817	23.649	0.475811	0.0295066
KRT81_HUMAN	Keratin, type II cuticular Hb1	25.8696	26.7509	0.483309	0.000264282
TFAM_HUMAN	Transcription factor A, mitochondrial	22.2787	23.038	0.483529	0.0107783
CBSL_HUMAN	Cystathionine beta-synthase-like protein	21.3179	22.0536	0.489501	2.11582e-06
AKP8L_HUMAN	A-kinase anchor protein 8-like	21.7333	22.4867	0.491603	6.1333e-07
CS043_HUMAN	Uncharacterized protein C19orf43	21.1879	21.9316	0.497699	0.00199501
UBP15_HUMAN	Ubiquitin carboxyl-terminal hydrolase 15	21.6263	22.3878	0.499293	1.26009e-05
LRCH1_HUMAN	Leucine-rich repeat and calponin homology domain-containing protein 1	19.6056	20.2999	0.50205	0.00371162
RPAC1_HUMAN	DNA-directed RNA polymerases I and III subunit RPAC1	23.2271	24.0663	0.512087	7.01456e-08
KLDC4_HUMAN	Kelch domain-containing protein 4	22.2607	23.0712	0.515952	5.59811e-05
MFN2_HUMAN	Mitofusin-2	21.1239	21.8995	0.52023	0.000188102
IMDH1_HUMAN	Inosine-5'-monophosphate dehydrogenase 1	25.6992	26.6433	0.520457	0.0262087
T22D4_HUMAN	TSC22 domain family protein 4	23.6248	24.5083	0.529703	0.0058798
CO3_HUMAN	Complement C3	23.1399	24.0334	0.546599	1.90545e-05
HAX1_HUMAN	HCLS1-associated protein X-1	19.6591	20.4253	0.551567	0.0490298
ICAM1_HUMAN	Intercellular adhesion molecule 1	26.9713	28.0273	0.554027	1.18794e-14
ACS2L_HUMAN	Acetyl-coenzyme A synthetase 2-like, mitochondrial	20.1291	20.9285	0.561843	0.00880907
FDFT_HUMAN	Squalene synthase	28.7972	29.9417	0.562269	1.12849e-05
ARP19_HUMAN	cAMP-regulated phosphoprotein 19	20.9664	21.8136	0.57147	0.040072
CHKA_HUMAN	Choline kinase alpha	23.4447	24.4213	0.588785	0.00572141
ALBU_HUMAN	Serum albumin	30.6347	31.9406	0.602273	3.14051e-07
ABHD8_HUMAN	Protein ABHD8	27.407	28.5813	0.605279	4.29403e-06
ITIH3_HUMAN	Inter-alpha-trypsin inhibitor heavy chain H3	20.2246	21.1152	0.621717	0.000967235
FERM2_HUMAN	Fermitin family homolog 2	29.651	31.0485	0.664407	4.52483e-07
PTER_HUMAN	Phosphotriesterase-related protein	18.7875	19.6774	0.667601	0.0326187
RTTN_HUMAN	Rotatin	20.6709	21.6636	0.676712	0.00774833
ATGA1_HUMAN	Autophagy-related protein 101	19.9077	20.872	0.682429	0.0405667
TRFL_HUMAN	Lactotransferrin	25.7417	27.0431	0.71154	1.42977e-06
PVR_HUMAN	Poliovirus receptor	21.0456	22.1849	0.7606	0.000267529
INPP_HUMAN	Inositol polyphosphate 1-phosphatase	21.4275	22.5894	0.761766	0.00126127
STK19_HUMAN	Serine/threonine-protein kinase 19	22.8202	24.0579	0.762007	3.8597e-05
NEBU_HUMAN	Nebulin	24.2241	25.5394	0.762838	1.77827e-07
GBRL1_HUMAN	Gamma-aminobutyric acid receptor-associated protein-like 1	21.3995	22.5651	0.765196	0.00947969
DPOLA_HUMAN	DNA polymerase alpha catalytic subunit	22.4536	23.6989	0.778736	0.000119505
TACC1_HUMAN	Transforming acidic coiled-coil-containing protein 1	18.4497	19.4743	0.779757	0.0493069
EXOS3_HUMAN	Exosome complex component RRP40	19.872	21.0056	0.800381	3.88875e-05
VCIP1_HUMAN	Deubiquitinating protein VCIP135	22.4664	23.7506	0.801906	0.013648
UT14A_HUMAN	U3 small nucleolar RNA-associated protein 14 homolog A	20.7264	21.9135	0.803491	2.72005e-14
THAP5_HUMAN	THAP domain-containing protein 5	22.3855	23.6978	0.821886	0.0130475
ZN334_HUMAN	Zinc finger protein 334	17.5828	18.6383	0.841048	0.0201629
MCFD2_HUMAN	Multiple coagulation factor deficiency protein 2	19.9455	21.1529	0.847936	0.0351231
NOP16_HUMAN	Nucleolar protein 16	19.1952	20.4274	0.897557	0.0018304
POC1B_HUMAN	POC1 centriolar protein homolog B	18.2894	19.4647	0.898508	0.0286101
PKHO2_HUMAN	Pleckstrin homology domain-containing family O member 2	20.1363	21.4447	0.908219	0.000564527
T176A_HUMAN	Transmembrane protein 176A	21.6141	23.0336	0.917667	1.23106e-05
SAM9L_HUMAN	Sterile alpha motif domain-containing protein 9-like	21.7699	23.2321	0.93787	0.0281869
PMS1_HUMAN	PMS1 protein homolog 1	22.4446	24.0071	0.970971	0.0385828
SQSTM_HUMAN	Sequestosome-1	23.551	25.2719	1.01744	9.21733e-07
TIM9_HUMAN	Mitochondrial import inner membrane translocase subunit Tim9	18.8926	20.2987	1.03568	0.0246694
NFKB2_HUMAN	Nuclear factor NF-kappa-B p100 subunit	20.4887	22.0239	1.04241	1.75697e-07
AMPD2_HUMAN	AMP deaminase 2	17.4937	18.8837	1.10308	0.0218452
ZUFSP_HUMAN	Zinc finger with UFM1-specific peptidase domain protein	24.1588	26.1735	1.15561	2.89525e-11
TFDP1_HUMAN	Transcription factor Dp-1	19.5688	21.4293	1.31025	0.000531963
VTDB_HUMAN	Vitamin D-binding protein	21.8802	24.1046	1.39682	8.2393e-06
COQ8A_HUMAN	Atypical kinase COQ8A, mitochondrial	16.2667	17.9786	1.44355	0.0299852
S1A7A_HUMAN	Protein S100-A7A	19.3209	21.7387	1.70098	0.0212993
T200A_HUMAN	Transmembrane protein 200A	17.1009	19.3213	1.76117	0.0260456
A1BG_HUMAN	Alpha-1B-glycoprotein	17.5864	20.6002	2.28193	2.69095e-05
ASB6_HUMAN	Ankyrin repeat and SOCS box protein 6	15.054	17.955	2.54239	0.000898047
