# Supplementary material for: Evaluation of potential anti-metastatic and antioxidative abilities of natural peptides derived from Tecoma stans (L.) Juss. ex Kunth in A549 cells
Source: PeerJ. 2022 Jul 6;10:e13693. doi: 10.7717/peerj.13693 (PMC9270879; doi:10.7717/peerj.13693)
Supplement: Supplemental Information 6 [file peerj-10-13693-s006.xlsx]

## Sheet: Sheet1
Migrated cell Number		Invaded cell number					%Cell migration		%Cell invasion
Control	Treatment	Control	Treatment				Control	Treatment	Control	Treatment
1280	97	510	1				100	7.57	39.84	0.08
1440	110	532	1				112.5	7.64	36.94	0.07
1414	101	526	1				110	7.14	37.2	0.07
