# Supplementary material for: Evaluation of potential anti-metastatic and antioxidative abilities of natural peptides derived from Tecoma stans (L.) Juss. ex Kunth in A549 cells
Source: PeerJ. 2022 Jul 6;10:e13693. doi: 10.7717/peerj.13693 (PMC9270879; doi:10.7717/peerj.13693)
Supplement: Supplemental Information 10 [file peerj-10-13693-s010.xlsx]

## Sheet: Sheet1
The viability, migration and invasion of A549 cells treated with synthetic peptide from RT of 36.5
Cell type	Conc. ug/ml	OD.1	OD.2	OD.3		%viability1	%viability2	%viability3
A549	0.78125	0.536	0.504	0.472		104.755	98.501	92.247
A549	1.5625	0.596	0.56	0.498		116.481	109.446	97.3284
A549	3.125	0.56	0.507	0.495		109.446	99.0873	96.742
A549	6.25	0.506	0.527	0.491		98.8919	102.996	95.9603
A549	12.5	0.581	0.534	0.559		113.55	104.364	109.25
A549	25	0.574	0.559	0.588		112.182	109.25	114.918
A549	50	0.496	0.495	0.497		96.9375	96.742	97.1329
A549	100	0.484	0.496	0.491		82.8659	91.0743	86.1884
A549	0.1%DMSO	0.516	0.524	0.495		100.846	102.41	96.742
Migrated cell Number		Invaded cell number			%Cell migration		%Cell invasion
Control	Treatment	Control	Treatment		Control	Treatment	Control	Treatment
1342	1365	662	655		100	101.714	49.3294	48.8077
1386	1374	715	693		103.279	99.1342	51.5873	50
