# Supplementary material for: Evaluation of potential anti-metastatic and antioxidative abilities of natural peptides derived from Tecoma stans (L.) Juss. ex Kunth in A549 cells
Source: PeerJ. 2022 Jul 6;10:e13693. doi: 10.7717/peerj.13693 (PMC9270879; doi:10.7717/peerj.13693)
Supplement: Supplemental Information 11 [file peerj-10-13693-s011.xlsx]

## Sheet: Sheet1
The oligonucleotides used for qRT-PCR and the relative gene expressions of A549 cells treated with natural peptides from Tecoma stans
Primer name		Sequence				Length
18 sRNA Forward		AGTTGGTGGAGCGATTTGTCTG				22
18 sRNA Reverse		CGGACATCTAAGGGCATCACAG				22
NCBP2 Forward		GAAAACGCCATGCGGTACATAA				22
NCBP2 Reverse		CATAGCCTCCTCTCCCAGC				19
ASB6 Reverse		TGGTGGATGCGATTCTGGG				19
ASB6 Forward		AAGGGAGAGTGGGCTTTCCTC				21
Genes	Conditions	Ct	Mean Ct	dCt	ddCt	Relative				Genes	Conditions	Ct	Mean Ct	dCt	ddCt	Relative
NCBP2	Control 1	24.88	24.9233	11.1233	0.00333333	0.997692				NCBP2	Control 2	24.9	24.8867	10.1667	-0.00333333	1.00231
NCBP2	Control 1	24.9								NCBP2	Control 2	24.92
NCBP2	Control 1	24.99								NCBP2	Control 2	24.84
NCBP2	Treatment 1	27.94	27.85	13.9067	2.78667	0.14492				NCBP2	Treatment 2	27.42	27.48	13.48	3.31	0.10083
NCBP2	Treatment 1	27.75								NCBP2	Treatment 2	27.52
NCBP2	Treatment 1	27.86								NCBP2	Treatment 2	27.5
ASB6	Control 1	25.53	25.4467	11.6467	-0.00333333	1.00231				ASB6	Control 2	25.64	25.62	10.9	0	1
ASB6	Control 1	25.47								ASB6	Control 2	25.59
ASB6	Control 1	25.34								ASB6	Control 2	25.63
ASB6	Treatment 1	24.31	24.3567	10.4133	-1.23667	2.35653				ASB6	Treatment 2	23.94	23.95	9.95	-0.95	1.93187
ASB6	Treatment 1	24.42								ASB6	Treatment 2	23.92
ASB6	Treatment 1	24.34								ASB6	Treatment 2	23.99
18sRNA	Control 1	13.72	13.8							18sRNA	Control 2	14.56	14.72
18sRNA	Control 1	13.81								18sRNA	Control 2	14.89
18sRNA	Control 1	13.87								18sRNA	Control 2	14.71
18sRNA	Treatment 1	13.92	13.9433							18sRNA	Treatment 2	14.13	14
18sRNA	Treatment 1	13.88								18sRNA	Treatment 2	13.96
18sRNA	Treatment 1	14.03								18sRNA	Treatment 2	13.91
